# Supplementary material for: Alteration in the Immune Microenvironment Based on APC Status in MSS/pMMR Colon Cancer
Source: Hindawi journal article supplement (doi:10.1155/2022/3592990), 2022-07-27
Supplement: f1 [file 3592990.f1.zip]

APC-wt colon cancer was significantly enriched in 115 KEGG pathways

| NAME       | GS         | fo      | GS | DETAILS | SIZE | ES  | NES       | NOM       | p-val     | FDR       | q-val | FWER  | p-val |
|------------|------------|---------|----|---------|------|-----|-----------|-----------|-----------|-----------|-------|-------|-------|
| KEGG_FOAI  | KEGG_FOAI  | Details | .. |         |      | 197 | 0.7570188 | 2.5582616 | 0         |           | 0     |       | 0     |
| KEGG_ECM   | KEGG_ECM   | Details | .. |         |      | 84  | 0.8450392 | 2.4824934 | 0         |           | 0     |       | 0     |
| KEGG_TGF   | KEGG_TGF   | Details | .. |         |      | 85  | 0.699227  | 2.396502  | 0         |           | 0     |       | 0     |
| KEGG_HEDG  | KEGG_HEDG  | Details | .. |         |      | 56  | 0.7310603 | 2.3887923 | 0         |           | 0     |       | 0     |
| KEGG_PATH  | KEGG_PATH  | Details | .. |         |      | 321 | 0.6324012 | 2.3709183 | 0         |           | 0     |       | 0     |
| KEGG_CYTO  | KEGG_CYTO  | Details | .. |         |      | 257 | 0.6428217 | 2.3637373 | 0         |           | 0     |       | 0     |
| KEGG_DILA  | KEGG_DILA  | Details | .. |         |      | 90  | 0.7160319 | 2.360433  | 0         |           | 0     |       | 0     |
| KEGG_HYPE  | KEGG_HYPE  | Details | .. |         |      | 83  | 0.7112744 | 2.3550224 | 0         |           | 0     |       | 0     |
| KEGG_BASA  | KEGG_BASA  | Details | .. |         |      | 55  | 0.7120349 | 2.3016324 | 0         | 1.45E-04  |       | 0.001 |       |
| KEGG_REGU  | KEGG_REGU  | Details | .. |         |      | 211 | 0.6093289 | 2.3015594 | 0         | 1.31E-04  |       | 0.001 |       |
| KEGG_AXON  | KEGG_AXON  | Details | .. |         |      | 127 | 0.6478015 | 2.280815  | 0         | 2.38E-04  |       | 0.001 |       |
| KEGG_CELL  | KEGG_CELL  | Details | .. |         |      | 128 | 0.7177891 | 2.2629921 | 0         | 2.18E-04  |       | 0.001 |       |
| KEGG_MELA  | KEGG_MELA  | Details | .. |         |      | 71  | 0.6393313 | 2.2466903 | 0         | 2.83E-04  |       | 0.002 |       |
| KEGG_RENA  | KEGG_RENA  | Details | .. |         |      | 66  | 0.6867642 | 2.2287743 | 0         | 2.63E-04  |       | 0.002 |       |
| KEGG_GAP   | KEGG_GAP   | Details | .. |         |      | 88  | 0.6145355 | 2.22563   | 0         | 2.45E-04  |       | 0.002 |       |
| KEGG_MAPK  | KEGG_MAPK  | Details | .. |         |      | 265 | 0.5767839 | 2.217498  | 0         | 2.74E-04  |       | 0.003 |       |
| KEGG_MELA  | KEGG_MELA  | Details | .. |         |      | 101 | 0.6050672 | 2.2054012 | 0         | 2.58E-04  |       | 0.003 |       |
| KEGG_ARRH  | KEGG_ARRH  | Details | .. |         |      | 74  | 0.6833643 | 2.1969879 | 0         | 3.47E-04  |       | 0.005 |       |
| KEGG_HEMA  | KEGG_HEMA  | Details | .. |         |      | 85  | 0.7132903 | 2.1830263 | 0         | 4.91E-04  |       | 0.007 |       |
| KEGG_CALC  | KEGG_CALC  | Details | .. |         |      | 176 | 0.5808979 | 2.1566815 | 0         | 9.05E-04  |       | 0.011 |       |
| KEGG_GLYC  | KEGG_GLYC  | Details | .. |         |      | 21  | 0.7722973 | 2.1509366 | 0         | 0.0010698 |       | 0.013 |       |
| KEGG_LEUK  | KEGG_LEUK  | Details | .. |         |      | 115 | 0.6243677 | 2.1440198 | 0         | 0.0010212 |       | 0.013 |       |
| KEGG_JAK   | KEGG_JAK   | Details | .. |         |      | 151 | 0.575643  | 2.1409948 | 0.002004  | 9.77E-04  |       | 0.013 |       |
| KEGG_WNT   | KEGG_WNT   | Details | .. |         |      | 149 | 0.571755  | 2.1285226 | 0         | 0.0012179 |       | 0.02  |       |
| KEGG_GLYC  | KEGG_GLYC  | Details | .. |         |      | 26  | 0.7095917 | 2.0743122 | 0         | 0.0024357 |       | 0.038 |       |
| KEGG_NEUR  | KEGG_NEUR  | Details | .. |         |      | 270 | 0.5265302 | 2.060153  | 0         | 0.0028584 |       | 0.047 |       |
| KEGG_CHEM  | KEGG_CHEM  | Details | .. |         |      | 184 | 0.6052579 | 2.0568697 | 0         | 0.0029295 |       | 0.05  |       |
| KEGG_SMAL  | KEGG_SMAL  | Details | .. |         |      | 84  | 0.6172912 | 2.0532057 | 0         | 0.0029061 |       | 0.051 |       |
| KEGG_LYSO  | KEGG_LYSO  | Details | .. |         |      | 119 | 0.6449431 | 2.04916   | 0         | 0.0029482 |       | 0.054 |       |
| KEGG_GLYC  | KEGG_GLYC  | Details | .. |         |      | 22  | 0.7997208 | 2.047203  | 0         | 0.0029929 |       | 0.057 |       |
| KEGG_TOLL  | KEGG_TOLL  | Details | .. |         |      | 101 | 0.5795874 | 2.0360425 | 0.00409   | 0.0033098 |       | 0.063 |       |
| KEGG_COMPI | KEGG_COMPI | Details | .. |         |      | 69  | 0.6784996 | 2.0193384 | 0         | 0.0037971 |       | 0.076 |       |
| KEGG_PROS  | KEGG_PROS  | Details | .. |         |      | 89  | 0.588153  | 2.0018654 | 0         | 0.0043582 |       | 0.087 |       |
| KEGG_NEUR  | KEGG_NEUR  | Details | .. |         |      | 125 | 0.5786549 | 1.9879212 | 0         | 0.005005  |       | 0.104 |       |
| KEGG_GLIO  | KEGG_GLIO  | Details | .. |         |      | 65  | 0.5951785 | 1.9777609 | 0         | 0.0052007 |       | 0.111 |       |
| KEGG_ADHE  | KEGG_ADHE  | Details | .. |         |      | 68  | 0.6035044 | 1.9666892 | 0         | 0.0057177 |       | 0.122 |       |
| KEGG_GLYC  | KEGG_GLYC  | Details | .. |         |      | 15  | 0.7473547 | 1.9592421 | 0.0077821 | 0.0061436 |       | 0.131 |       |
| KEGG_PANC  | KEGG_PANC  | Details | .. |         |      | 69  | 0.5903887 | 1.9589719 | 0         | 0.0060014 |       | 0.132 |       |
| KEGG_DORS  | KEGG_DORS  | Details | .. |         |      | 24  | 0.6370549 | 1.9462773 | 0.0020576 | 0.0066355 |       | 0.145 |       |
| KEGG_VASC  | KEGG_VASC  | Details | .. |         |      | 113 | 0.5658289 | 1.9459258 | 0.0059406 | 0.0064955 |       | 0.146 |       |
| KEGG_ADIP  | KEGG_ADIP  | Details | .. |         |      | 67  | 0.5707006 | 1.9274896 | 0.0040984 | 0.00752   |       | 0.16  |       |
| KEGG_NOD   | KEGG_NOD   | Details | .. |         |      | 60  | 0.5972339 | 1.9268221 | 0.005988  | 0.0074036 |       | 0.16  |       |
| KEGG_CHRO  | KEGG_CHRO  | Details | .. |         |      | 73  | 0.6028569 | 1.9063827 | 0.0020161 | 0.0084033 |       | 0.175 |       |
| KEGG_LEIS  | KEGG_LEIS  | Details | .. |         |      | 70  | 0.6640824 | 1.9061394 | 0.0176817 | 0.0082123 |       | 0.175 |       |
| KEGG_LONG  | KEGG_LONG  | Details | .. |         |      | 68  | 0.5212762 | 1.9045513 | 0         | 0.0082288 |       | 0.179 |       |
| KEGG_COLO  | KEGG_COLO  | Details | .. |         |      | 62  | 0.5908852 | 1.8996061 | 0.002004  | 0.0084304 |       | 0.185 |       |
| KEGG_MTOR  | KEGG_MTOR  | Details | .. |         |      | 51  | 0.5740153 | 1.8988478 | 0.0040733 | 0.0083109 |       | 0.185 |       |
| KEGG_T_CE  | KEGG_T_CE  | Details | .. |         |      | 106 | 0.5907225 | 1.8970954 | 0.0119522 | 0.008289  |       | 0.186 |       |
| KEGG_ABC   | KEGG_ABC   | Details | .. |         |      | 44  | 0.5575292 | 1.8886939 | 0.006263  | 0.0089152 |       | 0.198 |       |

|                                |     |           |           |           |           |       |
|--------------------------------|-----|-----------|-----------|-----------|-----------|-------|
| KEGG_NATUIKEGG_NATUIDetails .. | 131 | 0.5400499 | 1.8813905 | 0.0099206 | 0.009171  | 0.203 |
| KEGG_ACUTIKEGG_ACUTE_MYELOID_  | 57  | 0.5844306 | 1.8353963 | 0.004     | 0.0143084 | 0.258 |
| KEGG_ENDOKEGG_ENDOCYTOSIS      | 176 | 0.4970297 | 1.8333083 | 0         | 0.0142078 | 0.261 |
| KEGG_VIRAIKEGG_VIRAL_MYOCARDI  | 68  | 0.5829569 | 1.8299841 | 0.0219124 | 0.0143141 | 0.266 |
| KEGG_ERBBKEGG_ERBB_SIGNALING   | 86  | 0.5428832 | 1.8249168 | 0.0041068 | 0.0147894 | 0.272 |
| KEGG_APOPKEGG_APOPTOSIS        | 86  | 0.5223641 | 1.7724222 | 0.0232108 | 0.022413  | 0.344 |
| KEGG_ALDOKEGG_ALDOSTERONE_RE   | 42  | 0.5162706 | 1.7364743 | 0.0118812 | 0.0296708 | 0.395 |
| KEGG_FC_GKEGG_FC_GAMMA_R_MED   | 93  | 0.5245306 | 1.733982  | 0.0142566 | 0.0296304 | 0.395 |
| KEGG_PHOSIKEGG_PHOSPHATIDYLIN  | 76  | 0.5259326 | 1.7297846 | 0.0237624 | 0.0298874 | 0.402 |
| KEGG_BLADIKEGG_BLADDER_CANCER  | 40  | 0.5387683 | 1.7243181 | 0.0097656 | 0.0306054 | 0.415 |
| KEGG_TYPEKEGG_TYPE_II_DIABET   | 46  | 0.5178133 | 1.6815764 | 0.0221774 | 0.0400472 | 0.472 |
| KEGG_NOTCIKEGG_NOTCH_SIGNALIN  | 47  | 0.5407462 | 1.6798022 | 0.022541  | 0.0398559 | 0.474 |
| KEGG_INSUIKEGG_INSULIN_SIGNAL  | 137 | 0.4577613 | 1.677556  | 0.020202  | 0.0399354 | 0.482 |
| KEGG_TIGHKEGG_TIGHT_JUNCTION   | 128 | 0.4365727 | 1.6773155 | 0.007984  | 0.0394169 | 0.483 |
| KEGG_VEGFKEGG_VEGF_SIGNALING   | 75  | 0.4790858 | 1.6763093 | 0.0158416 | 0.0390907 | 0.484 |
| KEGG_RENIKEGG_RENIN_ANGIOTEN   | 17  | 0.6037012 | 1.6708702 | 0.019084  | 0.0401885 | 0.493 |
| KEGG_PROGIKEGG_PROGESTERONE_M  | 85  | 0.4827653 | 1.6696353 | 0.0220884 | 0.0399486 | 0.495 |
| KEGG_GNRHKEGG_GNRH_SIGNALING   | 101 | 0.4491693 | 1.6642652 | 0.0140281 | 0.0405705 | 0.501 |
| KEGG_LONGKEGG_LONG_TERM_POTE   | 69  | 0.4502982 | 1.6129675 | 0.0372549 | 0.0547724 | 0.574 |
| KEGG_EPITIKEGG_EPITHELIAL_CEL  | 67  | 0.4566164 | 1.612373  | 0.0315582 | 0.0541504 | 0.574 |
| KEGG_PRIOKEGG_PRION_DISEASES   | 35  | 0.5373277 | 1.6041636 | 0.0314342 | 0.0562426 | 0.586 |
| KEGG_ENDOKEGG_ENDOMETRIAL_CA   | 52  | 0.5222749 | 1.6035552 | 0.0408602 | 0.0555634 | 0.586 |
| KEGG_B_CEIKEGG_B_CELL_RECEPTO  | 74  | 0.5327803 | 1.5999873 | 0.0657371 | 0.0562285 | 0.591 |
| KEGG_OTHEIKEGG_OTHER_GLYCAN_D  | 16  | 0.6376672 | 1.5957426 | 0.0570825 | 0.0567849 | 0.598 |
| KEGG_INOSKEGG_INOSITOL_PHOSP   | 54  | 0.508684  | 1.5954226 | 0.0503145 | 0.0561487 | 0.599 |
| KEGG_FC_EIKEGG_FC_EPSILON_RI_  | 79  | 0.4389234 | 1.5518049 | 0.0475248 | 0.0705429 | 0.669 |
| KEGG_INTEKEGG_INTESTINAL_IMM   | 46  | 0.5691531 | 1.4997884 | 0.1411765 | 0.092031  | 0.743 |
| KEGG_VASOKEGG_VASOPRESSIN_RE   | 44  | 0.4354829 | 1.4715904 | 0.0510204 | 0.104516  | 0.77  |
| KEGG_RIGKEGG_RIG_I_LIKE_REC    | 69  | 0.4079681 | 1.461704  | 0.0699589 | 0.1086424 | 0.785 |
| KEGG_NONKEGG_NON_SMALL_CELL    | 54  | 0.442229  | 1.4081341 | 0.1078838 | 0.135588  | 0.84  |
| KEGG_ASTHIKEGG_ASTHMA          | 28  | 0.5429037 | 1.3804035 | 0.1926229 | 0.1520242 | 0.873 |
| KEGG_GRAFKEGG_GRAFT_VERSUS_H   | 37  | 0.595994  | 1.3799728 | 0.212     | 0.1504891 | 0.874 |
| KEGG_PATHKEGG_PATHOGENIC_ESC   | 56  | 0.3852621 | 1.3242348 | 0.1340996 | 0.1885971 | 0.923 |
| KEGG_OOCYKEGG_OOCYTE_MEIOSIS   | 110 | 0.3570168 | 1.2931105 | 0.1992188 | 0.2098406 | 0.94  |
| KEGG_SNARIKEGG_SNARE_INTERACT  | 38  | 0.4031101 | 1.2594641 | 0.1921488 | 0.2356426 | 0.958 |
| KEGG_REGUIKEGG_REGULATION_OF_  | 34  | 0.390283  | 1.2459625 | 0.1995885 | 0.245062  | 0.963 |
| KEGG_P53KEGG_P53_SIGNALING_    | 65  | 0.362116  | 1.2102549 | 0.2270916 | 0.2747865 | 0.974 |
| KEGG_SPHIIKEGG_SPHINGOLIPID_M  | 36  | 0.3762355 | 1.204333  | 0.253876  | 0.2770976 | 0.975 |
| KEGG_VIBRKEGG_VIBRIO_CHOLERA   | 53  | 0.3428931 | 1.1951721 | 0.2287449 | 0.282511  | 0.975 |
| KEGG_PRIMKEGG_PRIMARY_BILE_A   | 16  | 0.4323643 | 1.1861137 | 0.2309237 | 0.2886117 | 0.978 |
| KEGG_NICOKEGG_NICOTINATE_AND   | 22  | 0.3860522 | 1.1856996 | 0.2252066 | 0.2858422 | 0.978 |
| KEGG_PPARKEGG_PPAR_SIGNALING   | 69  | 0.3515833 | 1.1762629 | 0.244898  | 0.2923736 | 0.982 |
| KEGG_ALLOKEGG_ALLOGRAFT_REJE   | 35  | 0.500725  | 1.1714172 | 0.3239437 | 0.2940179 | 0.982 |
| KEGG_TYPEKEGG_TYPE_I_DIABETE   | 41  | 0.4499471 | 1.1703391 | 0.3307543 | 0.2921423 | 0.982 |
| KEGG_PURIKEGG_PURINE_METABOL   | 152 | 0.2983547 | 1.1453503 | 0.2842943 | 0.3149909 | 0.989 |
| KEGG_UBIQKEGG_UBIQUITIN_MEDI   | 130 | 0.3402306 | 1.1387328 | 0.31643   | 0.3184483 | 0.992 |
| KEGG_THYRKEGG_THYROID_CANCER   | 29  | 0.3752224 | 1.1337554 | 0.3031496 | 0.320078  | 0.992 |
| KEGG_AMYOKEGG_AMYOTROPHIC_LA   | 52  | 0.3041801 | 1.0749251 | 0.3513514 | 0.3817663 | 0.998 |
| KEGG_TYROKEGG_TYROSINE_METAB   | 40  | 0.3071046 | 1.0714182 | 0.3632734 | 0.381781  | 0.998 |
| KEGG_ARACIKEGG_ARACHIDONIC_AC  | 58  | 0.30103   | 1.0561208 | 0.3616162 | 0.3960246 | 0.999 |
| KEGG_ANTIKEGG_ANTIGEN_PROCES   | 80  | 0.331894  | 1.002565  | 0.4407115 | 0.4561516 | 1     |

|            |                     |     |           |           |           |           |   |
|------------|---------------------|-----|-----------|-----------|-----------|-----------|---|
| KEGG_LYSI  | KEGG_LYSINE_DEGRADA | 39  | 0.3300289 | 0.9602164 | 0.497992  | 0.5059297 | 1 |
| KEGG_AMIN  | KEGG_AMINO_SUGAR_AN | 44  | 0.3206492 | 0.9536998 | 0.4931238 | 0.5094618 | 1 |
| KEGG_TRYP  | KEGG_TRYPTOPHAN_MET | 39  | 0.2787183 | 0.9512767 | 0.541744  | 0.5080811 | 1 |
| KEGG_ETHER | KEGG_ETHER_LIPID_ME | 30  | 0.2924505 | 0.949746  | 0.5463511 | 0.5052497 | 1 |
| KEGG_SYSTI | KEGG_SYSTEMIC_LUPUS | 136 | 0.2923307 | 0.9496284 | 0.5019231 | 0.5005729 | 1 |
| KEGG_GALA  | KEGG_GALACTOSE_META | 26  | 0.3073849 | 0.9362506 | 0.5374016 | 0.5128763 | 1 |
| KEGG_STER  | KEGG_STEROID_HORMON | 55  | 0.2646864 | 0.8820784 | 0.6294821 | 0.5810363 | 1 |
| KEGG_CYTO  | KEGG_CYTOSOLIC_DNA  | 55  | 0.2558303 | 0.8738797 | 0.6313726 | 0.5865501 | 1 |
| KEGG_SELE  | KEGG_SELENOAMINO_AC | 25  | 0.300598  | 0.8562903 | 0.613497  | 0.6056925 | 1 |
| KEGG_AUTO  | KEGG_AUTOIMMUNE_THY | 50  | 0.3019708 | 0.8547735 | 0.5971944 | 0.6024281 | 1 |
| KEGG_PANT  | KEGG_PANTOTHENATE_A | 16  | 0.3034285 | 0.8233019 | 0.7137097 | 0.6396189 | 1 |
| KEGG_TAST  | KEGG_TASTE_TRANSDUC | 50  | 0.2441287 | 0.7914255 | 0.7514793 | 0.6800845 | 1 |
| KEGG_O_GL  | KEGG_O_GLYCAN_BIOSY | 26  | 0.2696083 | 0.7874782 | 0.7207031 | 0.6798658 | 1 |
| KEGG_PRIM  | KEGG_PRIMARY_IMMUNO | 35  | 0.318852  | 0.7718986 | 0.6647287 | 0.6962426 | 1 |
| KEGG_STAR  | KEGG_STARCH_AND_SUC | 52  | 0.2199791 | 0.7409043 | 0.8268839 | 0.7338253 | 1 |

# RANK AT M/LEADING EDGE

6654 tags=58%, list=12%, signal=66%  
 4486 tags=58%, list=8%, signal=63%  
 6092 tags=52%, list=11%, signal=58%  
 4160 tags=43%, list=8%, signal=46%  
 7173 tags=45%, list=13%, signal=52%  
 5340 tags=40%, list=10%, signal=44%  
 6790 tags=51%, list=12%, signal=58%  
 6790 tags=49%, list=12%, signal=56%  
 5849 tags=45%, list=11%, signal=51%  
 4706 tags=37%, list=9%, signal=40%  
 7159 tags=54%, list=13%, signal=61%  
 5339 tags=47%, list=10%, signal=52%  
 5340 tags=42%, list=10%, signal=47%  
 5340 tags=53%, list=10%, signal=59%  
 4998 tags=38%, list=9%, signal=41%  
 8823 tags=46%, list=16%, signal=55%  
 6670 tags=44%, list=12%, signal=49%  
 8377 tags=55%, list=15%, signal=65%  
 7342 tags=56%, list=13%, signal=65%  
 6356 tags=36%, list=12%, signal=40%  
 3336 tags=48%, list=6%, signal=51%  
 8049 tags=51%, list=15%, signal=60%  
 7304 tags=43%, list=13%, signal=49%  
 6670 tags=40%, list=12%, signal=46%  
 6136 tags=46%, list=11%, signal=52%  
 8070 tags=37%, list=15%, signal=43%  
 6453 tags=44%, list=12%, signal=50%  
 6831 tags=43%, list=12%, signal=49%  
 7871 tags=55%, list=14%, signal=64%  
 4916 tags=55%, list=9%, signal=60%  
 5766 tags=40%, list=10%, signal=44%  
 4830 tags=46%, list=9%, signal=51%  
 6045 tags=43%, list=11%, signal=48%  
 7393 tags=51%, list=13%, signal=59%  
 6453 tags=46%, list=12%, signal=52%  
 8533 tags=57%, list=15%, signal=68%  
 5827 tags=60%, list=11%, signal=67%  
 5050 tags=36%, list=9%, signal=40%  
 2556 tags=33%, list=5%, signal=35%  
 7095 tags=41%, list=13%, signal=47%  
 7188 tags=42%, list=13%, signal=48%  
 3701 tags=40%, list=7%, signal=43%  
 5050 tags=42%, list=9%, signal=47%  
 7342 tags=54%, list=13%, signal=63%  
 4998 tags=29%, list=9%, signal=32%  
 6940 tags=45%, list=13%, signal=52%  
 6887 tags=51%, list=12%, signal=58%  
 7080 tags=47%, list=13%, signal=54%  
 7469 tags=36%, list=14%, signal=42%

9160 tags=50%, list=17%, signal=60%  
6607 tags=51%, list=12%, signal=58%  
5998 tags=36%, list=11%, signal=41%  
9638 tags=51%, list=17%, signal=62%  
7038 tags=45%, list=13%, signal=52%  
7823 tags=45%, list=14%, signal=53%  
9160 tags=55%, list=17%, signal=66%  
6453 tags=41%, list=12%, signal=46%  
7212 tags=42%, list=13%, signal=48%  
5050 tags=33%, list=9%, signal=36%  
7640 tags=43%, list=14%, signal=50%  
7275 tags=47%, list=13%, signal=54%  
7188 tags=40%, list=13%, signal=46%  
8004 tags=34%, list=14%, signal=40%  
6733 tags=39%, list=12%, signal=44%  
5582 tags=47%, list=10%, signal=52%  
4998 tags=35%, list=9%, signal=39%  
6733 tags=31%, list=12%, signal=35%  
6356 tags=33%, list=12%, signal=38%  
6165 tags=33%, list=11%, signal=37%  
8255 tags=51%, list=15%, signal=60%  
8533 tags=50%, list=15%, signal=59%  
6732 tags=41%, list=12%, signal=46%  
3697 tags=31%, list=7%, signal=33%  
7196 tags=41%, list=13%, signal=47%  
6887 tags=33%, list=12%, signal=38%  
9851 tags=50%, list=18%, signal=61%  
9353 tags=48%, list=17%, signal=57%  
6865 tags=36%, list=12%, signal=41%  
10266 tags=52%, list=19%, signal=64%  
9638 tags=54%, list=17%, signal=65%  
12726 tags=73%, list=23%, signal=95%  
2758 tags=18%, list=5%, signal=19%  
4842 tags=25%, list=9%, signal=28%  
7631 tags=37%, list=14%, signal=43%  
6115 tags=32%, list=11%, signal=36%  
5085 tags=22%, list=9%, signal=24%  
2514 tags=19%, list=5%, signal=20%  
9727 tags=43%, list=18%, signal=53%  
3678 tags=19%, list=7%, signal=20%  
7224 tags=41%, list=13%, signal=47%  
4767 tags=23%, list=9%, signal=25%  
10547 tags=51%, list=19%, signal=64%  
10547 tags=49%, list=19%, signal=60%  
3704 tags=17%, list=7%, signal=18%  
6888 tags=29%, list=12%, signal=33%  
6672 tags=31%, list=12%, signal=35%  
3980 tags=21%, list=7%, signal=23%  
5454 tags=23%, list=10%, signal=25%  
5270 tags=17%, list=10%, signal=19%  
8460 tags=30%, list=15%, signal=35%

4671 tags=21%, list=8%, signal=22%  
6345 tags=27%, list=11%, signal=31%  
5454 tags=18%, list=10%, signal=20%  
9713 tags=37%, list=18%, signal=44%  
2434 tags=14%, list=4%, signal=15%  
3520 tags=15%, list=6%, signal=16%  
1761 tags=7%, list=3%, signal=8%  
3569 tags=16%, list=6%, signal=17%  
5209 tags=16%, list=9%, signal=18%  
10547 tags=38%, list=19%, signal=47%  
4193 tags=25%, list=8%, signal=27%  
3472 tags=10%, list=6%, signal=11%  
5827 tags=23%, list=11%, signal=26%  
7080 tags=26%, list=13%, signal=29%  
7174 tags=19%, list=13%, signal=22%
