# Supplementary material for: Alteration in the Immune Microenvironment Based on APC Status in MSS/pMMR Colon Cancer
Source: Hindawi journal article supplement (doi:10.1155/2022/3592990), 2022-07-27
Supplement: f1 [file 3592990.f1.zip]

APC-wt colon cancer was significantly down-regulated in 62 KEGG pathways

| NAME       | GS<br> fo  | GSDETAIL | SIZE | ES  | NES       | NOM       | p-val     | FDR       | q-val | FWER | p-val |
|------------|------------|----------|------|-----|-----------|-----------|-----------|-----------|-------|------|-------|
| KEGG_PARK  | KEGG_PARK  | Details  | ..   | 101 | -0.716056 | -2.06673  | 0.0020121 | 0.0245608 |       |      | 0.036 |
| KEGG_OXID  | KEGG_OXID  | Details  | ..   | 102 | -0.702676 | -2.009859 | 0.0060241 | 0.0271404 |       |      | 0.063 |
| KEGG_RIBO  | KEGG_RIBO  | Details  | ..   | 88  | -0.870405 | -1.941139 | 0.0020492 | 0.0408718 |       |      | 0.115 |
| KEGG_HUNT  | KEGG_HUNT  | Details  | ..   | 161 | -0.554882 | -1.90868  | 0.006135  | 0.0446227 |       |      | 0.149 |
| KEGG_ALZH  | KEGG_ALZH  | Details  | ..   | 145 | -0.530323 | -1.844796 | 0.0120724 | 0.0691133 |       |      | 0.236 |
| KEGG_BASE  | KEGG_BASE  | Details  | ..   | 35  | -0.664057 | -1.755026 | 0.0204918 | 0.1289716 |       |      | 0.37  |
| KEGG_PROT  | KEGG_PROT  | Details  | ..   | 45  | -0.694172 | -1.753771 | 0.0349076 | 0.1113154 |       |      | 0.37  |
| KEGG_CARD  | KEGG_CARD  | Details  | ..   | 74  | -0.477145 | -1.71678  | 0.0142857 | 0.130116  |       |      | 0.424 |
| KEGG_DNA_I | KEGG_DNA_I | Details  | ..   | 36  | -0.719833 | -1.692602 | 0.0553279 | 0.1374188 |       |      | 0.458 |
| KEGG_SPLI  | KEGG_SPLI  | Details  | ..   | 123 | -0.591338 | -1.663708 | 0.063786  | 0.1474051 |       |      | 0.509 |
| KEGG_TERP  | KEGG_TERP  | Details  | ..   | 15  | -0.667831 | -1.596217 | 0.0745342 | 0.2028757 |       |      | 0.622 |
| KEGG_GLYO  | KEGG_GLYO  | Details  | ..   | 16  | -0.646236 | -1.572221 | 0.0631365 | 0.2158829 |       |      | 0.671 |
| KEGG_RNA_I | KEGG_RNA_I | Details  | ..   | 29  | -0.569037 | -1.559251 | 0.0738523 | 0.2143454 |       |      | 0.687 |
| KEGG_MISM  | KEGG_MISM  | Details  | ..   | 23  | -0.648977 | -1.548417 | 0.0989474 | 0.2112742 |       |      | 0.702 |
| KEGG_PYRU  | KEGG_PYRU  | Details  | ..   | 39  | -0.481    | -1.468151 | 0.1       | 0.2969513 |       |      | 0.803 |
| KEGG_PYRI  | KEGG_PYRI  | Details  | ..   | 96  | -0.459985 | -1.460031 | 0.1182365 | 0.2904459 |       |      | 0.817 |
| KEGG_RNA_I | KEGG_RNA_I | Details  | ..   | 56  | -0.481067 | -1.455655 | 0.1361789 | 0.2793357 |       |      | 0.82  |
| KEGG_BUTAI | KEGG_BUTAI | Details  | ..   | 34  | -0.474558 | -1.436069 | 0.1187123 | 0.2898105 |       |      | 0.84  |
| KEGG_PENT  | KEGG_PENT  | Details  | ..   | 26  | -0.503913 | -1.423198 | 0.1391129 | 0.2919565 |       |      | 0.852 |
| KEGG_NUCL  | KEGG_NUCL  | Details  | ..   | 44  | -0.504924 | -1.41     | 0.1666667 | 0.2933846 |       |      | 0.866 |
| KEGG_AMIN  | KEGG_AMIN  | Details  | ..   | 41  | -0.564044 | -1.409759 | 0.1759834 | 0.2795571 |       |      | 0.866 |
| KEGG_PERO  | KEGG_PERO  | Details  | ..   | 78  | -0.440175 | -1.395769 | 0.1386139 | 0.2830099 |       |      | 0.873 |
| KEGG_FRUC  | KEGG_FRUC  | Details  | ..   | 34  | -0.476971 | -1.388244 | 0.1569417 | 0.2794099 |       |      | 0.876 |
| KEGG_GLUT  | KEGG_GLUT  | Details  | ..   | 49  | -0.438978 | -1.383554 | 0.122     | 0.2729605 |       |      | 0.88  |
| KEGG_CITR  | KEGG_CITR  | Details  | ..   | 30  | -0.568063 | -1.374652 | 0.1965812 | 0.2723741 |       |      | 0.889 |
| KEGG_STER  | KEGG_STER  | Details  | ..   | 16  | -0.571582 | -1.363814 | 0.1686747 | 0.2740345 |       |      | 0.897 |
| KEGG_HOMO  | KEGG_HOMO  | Details  | ..   | 26  | -0.517383 | -1.318483 | 0.2031873 | 0.3162612 |       |      | 0.931 |
| KEGG_GLYC  | KEGG_GLYC  | Details  | ..   | 25  | -0.469945 | -1.306371 | 0.1936685 | 0.3200841 |       |      | 0.937 |
| KEGG_ONE   | KEGG_ONE   | Details  | ..   | 17  | -0.515998 | -1.266169 | 0.2530364 | 0.3604342 |       |      | 0.961 |
| KEGG_PROT  | KEGG_PROT  | Details  | ..   | 23  | -0.490683 | -1.257894 | 0.255489  | 0.3596298 |       |      | 0.963 |
| KEGG_VALI  | KEGG_VALI  | Details  | ..   | 44  | -0.442422 | -1.221959 | 0.2563025 | 0.3949715 |       |      | 0.971 |
| KEGG_LINO  | KEGG_LINO  | Details  | ..   | 29  | -0.379625 | -1.207919 | 0.2144289 | 0.4018055 |       |      | 0.974 |
| KEGG_CELL  | KEGG_CELL  | Details  | ..   | 124 | -0.388234 | -1.169462 | 0.326572  | 0.4429504 |       |      | 0.986 |
| KEGG_MATU  | KEGG_MATU  | Details  | ..   | 25  | -0.434184 | -1.150775 | 0.306     | 0.4574757 |       |      | 0.99  |
| KEGG_ARGI  | KEGG_ARGI  | Details  | ..   | 51  | -0.343238 | -1.115959 | 0.3131313 | 0.4957393 |       |      | 0.99  |
| KEGG_DRUG  | KEGG_DRUG  | Details  | ..   | 51  | -0.32563  | -1.099853 | 0.3143418 | 0.5072616 |       |      | 0.992 |
| KEGG_PHEN  | KEGG_PHEN  | Details  | ..   | 17  | -0.367574 | -1.081574 | 0.3393939 | 0.5230021 |       |      | 0.993 |
| KEGG_GLYC  | KEGG_GLYC  | Details  | ..   | 25  | -0.342284 | -1.070383 | 0.3672199 | 0.527421  |       |      | 0.994 |
| KEGG_GLYC  | KEGG_GLYC  | Details  | ..   | 61  | -0.324414 | -1.051483 | 0.3827161 | 0.5442873 |       |      | 0.995 |
| KEGG_DRUG  | KEGG_DRUG  | Details  | ..   | 71  | -0.316827 | -1.047447 | 0.3817098 | 0.5379832 |       |      | 0.995 |
| KEGG_METAI | KEGG_METAI | Details  | ..   | 69  | -0.322765 | -1.029421 | 0.4135802 | 0.5521194 |       |      | 0.995 |
| KEGG_CYST  | KEGG_CYST  | Details  | ..   | 34  | -0.334621 | -1.022994 | 0.4263261 | 0.5490462 |       |      | 0.995 |
| KEGG_PROP  | KEGG_PROP  | Details  | ..   | 32  | -0.358874 | -1.021089 | 0.4218107 | 0.5388455 |       |      | 0.996 |
| KEGG_OLFA  | KEGG_OLFA  | Details  | ..   | 384 | -0.350146 | -1.016448 | 0.483366  | 0.5337167 |       |      | 0.996 |
| KEGG_ALAN  | KEGG_ALAN  | Details  | ..   | 32  | -0.327231 | -1.014323 | 0.4265594 | 0.5253028 |       |      | 0.996 |
| KEGG_RIBO  | KEGG_RIBO  | Details  | ..   | 15  | -0.367211 | -1.005421 | 0.4466801 | 0.5275526 |       |      | 0.997 |
| KEGG_RETI  | KEGG_RETI  | Details  | ..   | 63  | -0.292871 | -0.974082 | 0.4736842 | 0.5631051 |       |      | 0.998 |
| KEGG_PORPI | KEGG_PORPI | Details  | ..   | 41  | -0.318379 | -0.96892  | 0.4826176 | 0.5585555 |       |      | 0.998 |
| KEGG_HIST  | KEGG_HIST  | Details  | ..   | 27  | -0.303624 | -0.968445 | 0.4970531 | 0.5478495 |       |      | 0.998 |

|            |                     |            |    |           |           |           |           |       |
|------------|---------------------|------------|----|-----------|-----------|-----------|-----------|-------|
| KEGG_ASCOI | KEGG_ASCOI          | Details .. | 25 | -0.348523 | -0.946445 | 0.5155925 | 0.5697056 | 0.999 |
| KEGG_FATT  | KEGG_FATTY          | ACID_MET   | 42 | -0.319607 | -0.933691 | 0.5234216 | 0.577474  | 0.999 |
| KEGG_PROX  | KEGG_PROXIMAL       | TUBUL      | 23 | -0.305171 | -0.918246 | 0.5699589 | 0.5894022 | 0.999 |
| KEGG_NITR  | KEGG_NITROGEN       | METAB      | 23 | -0.293484 | -0.877401 | 0.6274132 | 0.6394163 | 0.999 |
| KEGG_BETA  | KEGG_BETA           | ALANINE_M  | 22 | -0.293683 | -0.874249 | 0.6121212 | 0.6325101 | 0.999 |
| KEGG_GLYCI | KEGG_GLYCEROPHOSPHO |            | 71 | -0.243909 | -0.862458 | 0.6600791 | 0.6388145 | 0.999 |
| KEGG_N_GL  | KEGG_N_GLYCAN       | BIOSY      | 46 | -0.301109 | -0.856141 | 0.62      | 0.6366682 | 0.999 |
| KEGG_GLYC  | KEGG_GLYCINE        | SERINE     | 31 | -0.270687 | -0.822436 | 0.6839917 | 0.675233  | 0.999 |
| KEGG_GLYCI | KEGG_GLYCEROLIPID   | M          | 43 | -0.241441 | -0.777295 | 0.8056112 | 0.7314289 | 0.999 |
| KEGG_PENT  | KEGG_PENTOSE_AND_GL |            | 27 | -0.260357 | -0.722586 | 0.7884232 | 0.7980396 | 1     |
| KEGG_BIOS  | KEGG_BIOSYNTHESIS   | O          | 20 | -0.244227 | -0.648088 | 0.8902439 | 0.8794258 | 1     |
| KEGG_BASAI | KEGG_BASAL          | TRANSCRI   | 35 | -0.209067 | -0.639179 | 0.8897638 | 0.8747085 | 1     |
| KEGG_ALPH  | KEGG_ALPHA          | LINOLENI   | 19 | -0.201553 | -0.586172 | 0.9566116 | 0.9119418 | 1     |

lys

RANK AT M/LEADING EDGE

5518 tags=58%, list=10%, signal=65%  
2542 tags=51%, list=5%, signal=53%  
3757 tags=83%, list=7%, signal=89%  
6814 tags=46%, list=12%, signal=52%  
2568 tags=37%, list=5%, signal=38%  
13978 tags=77%, list=25%, signal=103%  
8682 tags=69%, list=16%, signal=82%  
2483 tags=27%, list=4%, signal=28%  
6010 tags=64%, list=11%, signal=72%  
7940 tags=45%, list=14%, signal=52%  
3774 tags=40%, list=7%, signal=43%  
7995 tags=56%, list=14%, signal=66%  
7764 tags=41%, list=14%, signal=48%  
13014 tags=61%, list=24%, signal=80%  
6928 tags=38%, list=13%, signal=44%  
12982 tags=51%, list=23%, signal=67%  
3802 tags=32%, list=7%, signal=34%  
12272 tags=50%, list=22%, signal=64%  
9992 tags=42%, list=18%, signal=52%  
8276 tags=41%, list=15%, signal=48%  
12922 tags=49%, list=23%, signal=64%  
7671 tags=35%, list=14%, signal=40%  
3571 tags=32%, list=6%, signal=35%  
9345 tags=45%, list=17%, signal=54%  
4068 tags=37%, list=7%, signal=40%  
2636 tags=38%, list=5%, signal=39%  
12982 tags=50%, list=23%, signal=65%  
10701 tags=40%, list=19%, signal=50%  
14984 tags=71%, list=27%, signal=97%  
8022 tags=35%, list=15%, signal=41%  
11443 tags=43%, list=21%, signal=54%  
17582 tags=45%, list=32%, signal=66%  
5610 tags=34%, list=10%, signal=38%  
3504 tags=20%, list=6%, signal=21%  
7153 tags=29%, list=13%, signal=34%  
15409 tags=39%, list=28%, signal=54%  
7214 tags=41%, list=13%, signal=47%  
4117 tags=20%, list=7%, signal=22%  
6334 tags=26%, list=11%, signal=30%  
9345 tags=31%, list=17%, signal=37%  
9345 tags=32%, list=17%, signal=38%  
2955 tags=21%, list=5%, signal=22%  
13654 tags=41%, list=25%, signal=54%  
24086 tags=63%, list=44%, signal=110%  
9252 tags=34%, list=17%, signal=41%  
3396 tags=27%, list=6%, signal=28%  
13548 tags=32%, list=25%, signal=42%  
2910 tags=15%, list=5%, signal=15%  
10618 tags=41%, list=19%, signal=50%

26066 tags=64%, list=47%, signal=121%  
11321 tags=36%, list=20%, signal=45%  
10918 tags=26%, list=20%, signal=32%  
9491 tags=26%, list=17%, signal=31%  
1993 tags=18%, list=4%, signal=19%  
5790 tags=18%, list=10%, signal=20%  
18187 tags=46%, list=33%, signal=68%  
5569 tags=23%, list=10%, signal=25%  
3254 tags=16%, list=6%, signal=17%  
26066 tags=56%, list=47%, signal=105%  
1380 tags=10%, list=2%, signal=10%  
13395 tags=23%, list=24%, signal=30%  
18202 tags=37%, list=33%, signal=55%
