# Supplementary material for: Alteration in the Immune Microenvironment Based on APC Status in MSS/pMMR Colon Cancer
Source: Hindawi journal article supplement (doi:10.1155/2022/3592990), 2022-07-27
Supplement: f1 [file 3592990.f1.zip]

# Lasso and Cox regression analyses APC related DEGs Constructing immune scoring model

| id               | futime              | fusion | SSTR2          | SCG2           | CCL19         | CD22           | NFATC1        | LHB            | riskScore           | risk |
|------------------|---------------------|--------|----------------|----------------|---------------|----------------|---------------|----------------|---------------------|------|
| TCGA-A<br>M-5820 | 0.038<br>35616<br>4 | 0      | 0.090<br>50476 | 4.712<br>204   | 0.537<br>9994 | 0.162<br>8935  | 0.384<br>9265 | 0              | 1.395<br>82712<br>7 | high |
| TCGA-F<br>4-6854 | 0.043<br>83561<br>6 | 0      | 0.085<br>04743 | 1.416<br>936   | 4.032<br>803  | 0.177<br>929   | 0.551<br>3765 | 0              | 1.151<br>05850<br>4 | low  |
| TCGA-A<br>M-5821 | 0.076<br>71232<br>9 | 0      | 0.055<br>00639 | 2.497<br>458   | 2.192<br>594  | 1.059<br>692   | 1.121<br>955  | 0.321<br>1569  | 1.781<br>76481<br>4 | high |
| TCGA-A<br>A-A020 | 0.076<br>71232<br>9 | 0      | 0.014<br>86308 | 0.929<br>9766  | 0.750<br>9969 | 0.063<br>16226 | 0.377<br>5192 | 0.297<br>5269  | 1.422<br>61907      | high |
| TCGA-A<br>A-3818 | 0.082<br>19178<br>1 | 1      | 0.072<br>1406  | 1.083<br>314   | 0.583<br>2155 | 0.085<br>83939 | 0.208<br>2223 | 0              | 1.093<br>51712      | low  |
| TCGA-A<br>A-3856 | 0.082<br>19178<br>1 | 0      | 0.186<br>6675  | 0.420<br>7324  | 8.879<br>764  | 0.731<br>3504  | 0.756<br>9285 | 0              | 1.134<br>49072<br>7 | low  |
| TCGA-A<br>A-3821 | 0.084<br>93150<br>7 | 0      | 0.184<br>2426  | 0.335<br>0011  | 0             | 0.165<br>2913  | 1.943<br>976  | 1.741<br>621   | 5.563<br>68734<br>7 | high |
| TCGA-A<br>A-3494 | 0.084<br>93150<br>7 | 0      | 0.045<br>89694 | 0.382<br>9003  | 0.721<br>4871 | 0.058<br>5132  | 0.198<br>7113 | 0.076<br>56316 | 1.116<br>88787<br>4 | low  |
| TCGA-A<br>A-A01V | 0.084<br>93150<br>7 | 0      | 0.016<br>48716 | 0.095<br>22412 | 1.666<br>116  | 0.077<br>07037 | 0.342<br>6304 | 0.082<br>50937 | 1.114<br>37730<br>3 | low  |
| TCGA-A<br>A-3496 | 0.084<br>93150<br>7 | 0      | 0.139<br>6321  | 0.432<br>0357  | 3.628<br>432  | 0.267<br>0218  | 0.602<br>3796 | 0.224<br>609   | 1.333<br>70056<br>4 | high |
| TCGA-A<br>A-A01S | 0.084<br>93150<br>7 | 0      | 0.070<br>7625  | 0.015<br>71922 | 0             | 0.013<br>87906 | 0.164<br>9668 | 0.326<br>8876  | 1.357<br>00971      | high |
| TCGA-A<br>Z-4323 | 0.117<br>80821<br>9 | 1      | 7.727<br>598   | 23.16<br>609   | 225.7<br>216  | 23.12<br>822   | 7.163<br>986  | 1.841<br>546   | 163.1<br>84019<br>6 | high |
| TCGA-5<br>M-AAT4 | 0.134<br>24657<br>5 | 1      | 0.078<br>89829 | 5.346<br>753   | 0.132<br>8849 | 0.043<br>58728 | 0.177<br>6273 | 0.197<br>4217  | 1.693<br>47759      | high |
| TCGA-A           | 0.161               | 1      | 0.057          | 0.041          | 0.243         | 0.012          | 0.091         | 0.181          | 1.187               | low  |

|                  |                     |   |                |                |               |                |                |                |                     |          |
|------------------|---------------------|---|----------------|----------------|---------------|----------------|----------------|----------------|---------------------|----------|
| Z-6608           | 64383<br>6          |   | 8754           | 78352          | 6924          | 29739          | 87645          | 022            | 74948<br>2          | w        |
| TCGA-A<br>A-A02H | 0.167<br>12328<br>8 | 1 | 0.230<br>2005  | 0.941<br>7702  | 1.550<br>866  | 0.122<br>2827  | 0.282<br>3857  | 0.576<br>0147  | 1.828<br>27790<br>9 | hi<br>gh |
| TCGA-A<br>A-3666 | 0.167<br>12328<br>8 | 1 | 0.084<br>46584 | 0.548<br>8261  | 0.569<br>0483 | 0.134<br>605   | 0.938<br>6191  | 0              | 1.116<br>91190<br>7 | lo<br>w  |
| TCGA-C<br>K-6748 | 0.167<br>12328<br>8 | 0 | 0.048<br>58025 | 2.404<br>083   | 0.178<br>5198 | 0.216<br>7693  | 0.529<br>6459  | 0.033<br>15245 | 1.258<br>71832<br>6 | hi<br>gh |
| TCGA-A<br>A-3952 | 0.167<br>12328<br>8 | 1 | 0.055<br>90697 | 0.909<br>9889  | 0.256<br>8045 | 0.123<br>111   | 1.016<br>609   | 0.228<br>9144  | 1.404<br>87546<br>9 | hi<br>gh |
| TCGA-A<br>A-3930 | 0.167<br>12328<br>8 | 1 | 0.167<br>048   | 0.916<br>5708  | 3.629<br>435  | 0.255<br>5599  | 0.433<br>9417  | 0.125<br>3978  | 1.244<br>46246<br>4 | lo<br>w  |
| TCGA-A<br>A-3966 | 0.167<br>12328<br>8 | 0 | 0.190<br>6409  | 1.535<br>711   | 3.853<br>056  | 0.179<br>0855  | 1.033<br>899   | 0.150<br>6402  | 1.375<br>87819<br>2 | hi<br>gh |
| TCGA-C<br>A-5256 | 0.178<br>08219<br>2 | 0 | 0.010<br>78438 | 0.420<br>4362  | 1.525<br>747  | 0.041<br>24645 | 0.093<br>38219 | 0.080<br>95504 | 1.113<br>54174<br>8 | lo<br>w  |
| TCGA-C<br>A-5254 | 0.186<br>30137      | 0 | 0.039<br>45642 | 0.721<br>6409  | 0.310<br>1219 | 0.142<br>5232  | 0.349<br>2463  | 0.131<br>6388  | 1.215<br>60712<br>1 | lo<br>w  |
| TCGA-A<br>A-A02E | 0.246<br>57534<br>2 | 1 | 0.025<br>1165  | 0.417<br>0595  | 0.126<br>9078 | 0.016<br>01029 | 0.391<br>4717  | 0.188<br>5418  | 1.249<br>23040<br>4 | lo<br>w  |
| TCGA-C<br>M-6680 | 0.249<br>31506<br>8 | 0 | 0.116<br>3091  | 1.479<br>474   | 2.994<br>384  | 0.268<br>317   | 0.774<br>5256  | 0.083<br>15207 | 1.270<br>57630<br>4 | hi<br>gh |
| TCGA-C<br>A-5255 | 0.254<br>79452<br>1 | 0 | 0.024<br>08509 | 0.965<br>0558  | 0.334<br>665  | 0.149<br>6901  | 0.114<br>7043  | 0.135<br>5995  | 1.218<br>08177<br>2 | lo<br>w  |
| TCGA-A<br>Z-6607 | 0.265<br>75342<br>5 | 1 | 0.150<br>8662  | 12.84<br>295   | 5.336<br>043  | 1.434<br>162   | 2.252<br>04    | 0.738<br>591   | 5.463<br>02412<br>2 | hi<br>gh |
| TCGA-C<br>A-5796 | 0.271<br>23287<br>7 | 0 | 0.035<br>94905 | 0.069<br>20973 | 0.766<br>9335 | 0.127<br>3078  | 0.529<br>182   | 0.059<br>96854 | 1.108<br>35263<br>4 | lo<br>w  |
| TCGA-C<br>A-5797 | 0.273<br>97260<br>3 | 0 | 0.019<br>65922 | 0.879<br>9726  | 0.844<br>3346 | 0.169<br>1766  | 0.408<br>5511  | 0.036<br>89394 | 1.134<br>61317<br>2 | lo<br>w  |

|                  |                     |   |                |               |                |                |               |                |                     |          |
|------------------|---------------------|---|----------------|---------------|----------------|----------------|---------------|----------------|---------------------|----------|
| TCGA-A<br>A-A00N | 0.334<br>24657<br>5 | 1 | 0.084<br>95217 | 0.470<br>2103 | 0.429<br>2435  | 0.099<br>27868 | 1.293<br>435  | 0.425<br>1399  | 1.658<br>04247<br>2 | hi<br>gh |
| TCGA-C<br>M-6678 | 0.334<br>24657<br>5 | 0 | 0.030<br>16282 | 1.782<br>302  | 0.562<br>7288  | 0.044<br>37006 | 0.257<br>1623 | 0.104<br>5029  | 1.253<br>21115<br>5 | hi<br>gh |
| TCGA-C<br>M-4752 | 0.336<br>98630<br>1 | 0 | 0.139<br>1294  | 0.730<br>512  | 4.154<br>023   | 0.403<br>1219  | 0.525<br>6979 | 0              | 1.115<br>56736      | lo<br>w  |
| TCGA-C<br>M-6677 | 0.419<br>17808<br>2 | 0 | 0.153<br>5654  | 0.743<br>1123 | 2.264<br>877   | 0.380<br>973   | 0.531<br>8904 | 0              | 1.115<br>58746<br>1 | lo<br>w  |
| TCGA-A<br>A-3696 | 0.419<br>17808<br>2 | 1 | 0<br>199       | 1.441<br>199  | 0.336<br>2179  | 0<br>0         | 0.460<br>9464 | 0.999<br>0109  | 2.740<br>50028<br>3 | hi<br>gh |
| TCGA-C<br>M-5862 | 0.419<br>17808<br>2 | 1 | 0.075<br>54959 | 0.976<br>5888 | 0.109<br>067   | 0.036<br>69213 | 0.168<br>2191 | 0.054<br>01214 | 1.133<br>35288<br>6 | lo<br>w  |
| TCGA-C<br>M-6676 | 0.419<br>17808<br>2 | 0 | 0.134<br>0371  | 1.223<br>159  | 0.677<br>258   | 0.143<br>5404  | 0.510<br>6771 | 0.040<br>247   | 1.173<br>73693<br>1 | lo<br>w  |
| TCGA-A<br>Z-4616 | 0.427<br>39726      | 1 | 0.160<br>0925  | 4.969<br>934  | 0.404<br>4551  | 0.125<br>8611  | 0.679<br>2598 | 0.440<br>6473  | 2.140<br>74657<br>5 | hi<br>gh |
| TCGA-A<br>Z-6605 | 0.435<br>61643<br>8 | 1 | 0.203<br>1431  | 1.810<br>938  | 22.49<br>231   | 0.848<br>2649  | 1.478<br>597  | 0.132<br>6028  | 1.479<br>96705<br>9 | hi<br>gh |
| TCGA-A<br>Z-4614 | 0.471<br>23287<br>7 | 1 | 0.081<br>74621 | 0.368<br>8576 | 0.051<br>63057 | 0.026<br>0542  | 1.349<br>324  | 0.383<br>5273  | 1.587<br>83178<br>6 | hi<br>gh |
| TCGA-D<br>M-A285 | 0.490<br>41095<br>9 | 1 | 0.121<br>8723  | 2.075<br>269  | 0.063<br>70267 | 0.064<br>29223 | 0.693<br>2197 | 0.063<br>09366 | 1.273<br>78592<br>3 | hi<br>gh |
| TCGA-C<br>M-6168 | 0.495<br>89041<br>1 | 0 | 0.200<br>3194  | 2.862<br>772  | 18.37<br>473   | 1.424<br>255   | 1.194<br>185  | 0.077<br>11467 | 1.517<br>76141<br>2 | hi<br>gh |
| TCGA-A<br>A-3681 | 0.498<br>63013<br>7 | 0 | 0.091<br>36839 | 0.395<br>7841 | 2.539<br>147   | 0.786<br>2666  | 0.534<br>0335 | 0.228<br>6248  | 1.362<br>83404      | hi<br>gh |
| TCGA-C<br>M-6171 | 0.498<br>63013<br>7 | 0 | 0.337<br>0221  | 26.02<br>663  | 0.312<br>1973  | 0.379<br>5361  | 0.252<br>9177 | 0.084<br>33071 | 5.761<br>64068<br>7 | hi<br>gh |
| TCGA-C<br>M-4743 | 0.504<br>10958      | 0 | 0.430<br>3906  | 0.162<br>5322 | 1.137<br>516   | 0.067<br>53198 | 1.146<br>696  | 1.391<br>733   | 3.826<br>69663      | hi<br>gh |

|        |       |   |       |       |       |       |       |       |       |    |
|--------|-------|---|-------|-------|-------|-------|-------|-------|-------|----|
|        | 9     |   |       |       |       |       |       |       | 2     |    |
| TCGA-A | 0.504 |   |       |       |       |       |       |       |       |    |
| A-3662 | 10958 | 0 | 0.066 | 0.511 | 4.610 | 1.004 | 0.374 | 0.130 | 1.258 | hi |
|        | 9     |   | 84259 | 9486  | 886   | 072   | 9562  | 8957  | 69754 | gh |
| TCGA-F | 0.515 |   |       |       |       |       |       |       | 1.863 | hi |
| 4-6570 | 06849 | 1 | 0.174 | 2.460 | 1.812 | 0.363 | 5.280 | 0.079 | 72325 | gh |
|        | 3     |   | 0733  | 151   | 409   | 1466  | 132   | 19481 | 6     |    |
| TCGA-A | 0.580 |   |       |       |       |       |       |       | 1.126 | lo |
| A-3663 | 82191 | 0 | 0.114 | 0.236 | 0.594 | 0.125 | 0.716 | 0.049 | 65947 | w  |
|        | 8     |   | 4679  | 1168  | 905   | 0856  | 4817  | 10146 | 4     |    |
| TCGA-C | 0.580 |   |       |       |       |       |       |       | 1.201 | lo |
| M-6165 | 82191 | 0 | 0.108 | 1.745 | 5.010 | 0.379 | 0.709 | 0     | 88184 | w  |
|        | 8     |   | 7556  | 845   | 302   | 2503  | 0578  |       | 3     |    |
| TCGA-A | 0.580 |   |       |       |       |       |       |       | 1.342 | hi |
| A-3511 | 82191 | 0 | 0.111 | 1.807 | 0.760 | 0.368 | 0.420 | 0.145 | 84934 | gh |
|        | 8     |   | 6101  | 742   | 0928  | 0974  | 1887  | 7083  | 9     |    |
| TCGA-C | 0.580 |   |       |       |       |       |       |       | 1.254 | hi |
| M-6172 | 82191 | 0 | 0.135 | 0.451 | 0.238 | 0.143 | 0.414 | 0.177 | 17789 | gh |
|        | 8     |   | 8139  | 8905  | 6907  | 0342  | 1618  | 3066  | 7     |    |
| TCGA-A | 0.586 |   |       |       |       |       |       |       | 3.303 | hi |
| A-3489 | 30137 | 1 | 0.377 | 6.978 | 61.48 | 9.222 | 2.677 | 0.069 | 68505 | gh |
|        |       |   | 813   | 782   | 381   | 164   | 037   | 17381 | 9     |    |
| TCGA-C | 0.586 |   |       |       |       |       |       |       | 1.113 | lo |
| M-4744 | 30137 | 0 | 0.044 | 0.088 | 1.850 | 0.121 | 0.177 | 0.091 | 57074 | w  |
|        |       |   | 76603 | 14308 | 664   | 9253  | 9574  | 64857 |       |    |
| TCGA-D | 0.624 |   |       |       |       |       |       |       | 1.055 | lo |
| M-A1DA | 65753 | 1 | 0.064 | 0.142 | 0.422 | 0.075 | 0.197 | 0.028 | 67917 | w  |
|        | 4     |   | 54791 | 5436  | 0707  | 03002 | 2665  | 50243 | 8     |    |
| TCGA-D | 0.627 |   |       |       |       |       |       |       | 1.375 | hi |
| 5-6898 | 39726 | 0 | 0.095 | 2.201 | 2.271 | 0.452 | 0.872 | 0.104 | 91335 | gh |
|        |       |   | 01957 | 893   | 748   | 0544  | 9457  | 3828  | 1     |    |
| TCGA-D | 0.646 |   |       |       |       |       |       |       | 1.248 | lo |
| M-A280 | 57534 | 1 | 0.064 | 0.212 | 0.155 | 0.054 | 0.571 | 0.184 | 72725 | w  |
|        | 2     |   | 49069 | 8433  | 1697  | 81203 | 7221  | 4235  | 7     |    |
| TCGA-C | 0.663 |   |       |       |       |       |       |       | 1.208 | lo |
| M-6170 | 01369 | 0 | 0.043 | 2.011 | 5.723 | 0.536 | 0.457 | 0     | 03934 | w  |
|        | 9     |   | 3735  | 45    | 844   | 6975  | 3141  |       | 5     |    |
| TCGA-A | 0.663 |   |       |       |       |       |       |       | 1.087 | lo |
| A-3989 | 01369 | 1 | 0.047 | 0.639 | 2.056 | 0.190 | 0.456 | 0     | 91585 | w  |
|        | 9     |   | 8836  | 5428  | 53    | 7686  | 0876  |       | 3     |    |
| TCGA-A | 0.663 |   |       |       |       |       |       |       | 1.434 | hi |
| A-3980 | 01369 | 0 | 0.168 | 0.217 | 1.053 | 0.228 | 1.394 | 0.260 | 82060 | gh |
|        | 9     |   | 0242  | 5146  | 915   | 9843  | 722   | 9599  | 8     |    |
| TCGA-C | 0.665 |   |       |       |       |       |       |       | 1.206 | lo |
| M-6169 | 75342 | 0 | 0.278 | 0.952 | 3.202 | 0.503 | 1.305 | 0     | 50640 | w  |
|        |       |   | 14    | 6563  | 951   | 0312  | 028   |       |       |    |

|        |       |   |       |       |       |       |       |       |       |    |
|--------|-------|---|-------|-------|-------|-------|-------|-------|-------|----|
|        | 5     |   |       |       |       |       |       |       | 9     |    |
| TCGA-A | 0.676 |   |       |       |       |       |       |       | 1.275 | hi |
| 6-3810 | 71232 | 0 | 0.258 | 2.658 | 2.285 | 0.175 | 0.839 | 0     | 78945 | gh |
|        | 9     |   | 4187  | 581   | 027   | 0221  | 1199  |       | 6     |    |
| TCGA-G | 0.695 |   |       |       |       |       |       |       | 1.210 | lo |
| 4-6295 | 89041 | 0 | 0.081 | 0.122 | 16.09 | 1.594 | 0.713 | 0.048 | 72918 | w  |
|        | 1     |   | 4131  | 2556  | 246   | 247   | 4172  | 89145 | 9     |    |
| TCGA-F | 0.717 |   |       |       |       |       |       |       | 1.532 | hi |
| 4-6459 | 80821 | 1 | 0.264 | 4.089 | 2.059 | 0.398 | 1.003 | 0.079 | 45031 | gh |
|        | 9     |   | 6744  | 185   | 5     | 1658  | 818   | 47316 | 9     |    |
| TCGA-C | 0.747 |   |       |       |       |       |       |       | 1.139 | lo |
| M-5341 | 94520 | 0 | 0.096 | 0.357 | 1.305 | 0.089 | 0.400 | 0.080 | 22305 | w  |
|        | 5     |   | 85591 | 3983  | 041   | 17992 | 7014  | 78528 | 4     |    |
| TCGA-D | 0.753 |   |       |       |       |       |       |       | 1.699 | hi |
| 5-6926 | 42465 | 0 | 0.142 | 3.717 | 1.242 | 0.174 | 0.930 | 0.246 | 66961 | gh |
|        | 8     |   | 1264  | 606   | 92    | 2254  | 1066  | 2075  | 5     |    |
| TCGA-A | 0.761 |   |       |       |       |       |       |       | 1.080 | lo |
| 6-6650 | 64383 | 0 | 0.057 | 0.340 | 0.455 | 0.047 | 0.260 | 0.037 | 56439 | w  |
|        | 6     |   | 64232 | 1594  | 8746  | 92641 | 4136  | 62636 | 4     |    |
| TCGA-A | 0.764 |   |       |       |       |       |       |       | 1.834 | hi |
| 6-3808 | 38356 | 0 | 0.196 | 1.375 | 14.15 | 0.517 | 1.564 | 0.420 | 03702 | gh |
|        | 2     |   | 1383  | 575   | 773   | 9674  | 922   | 6713  | 7     |    |
| TCGA-A | 0.767 |   |       |       |       |       |       |       | 1.250 | lo |
| 6-6138 | 12328 | 0 | 0.134 | 1.404 | 6.363 | 0.419 | 0.993 | 0.042 | 22270 | w  |
|        | 8     |   | 9425  | 51    | 777   | 3374  | 1997  | 20717 | 9     |    |
| TCGA-A | 0.783 |   |       |       |       |       |       |       | 1.260 | hi |
| 6-5659 | 56164 | 0 | 0.123 | 2.218 | 1.311 | 0.192 | 0.313 | 0.063 | 85550 | gh |
|        | 4     |   | 4035  | 083   | 562   | 5875  | 1968  | 88636 | 6     |    |
| TCGA-D | 0.786 |   |       |       |       |       |       |       | 1.460 | hi |
| 5-6927 | 30137 | 0 | 0.084 | 1.298 | 0.822 | 0.230 | 0.668 | 0.265 | 64165 | gh |
|        |       |   | 96549 | 393   | 8458  | 1821  | 2772  | 7541  | 3     |    |
| TCGA-5 | 0.794 |   |       |       |       |       |       |       | 4.837 | hi |
| M-AAT6 | 52054 | 1 | 0.336 | 1.005 | 17.59 | 0.729 | 2.572 | 1.442 | 80780 | gh |
|        | 8     |   | 2698  | 771   | 775   | 8183  | 061   | 442   | 6     |    |
| TCGA-C | 0.832 |   |       |       |       |       |       |       | 1.216 | lo |
| M-5863 | 87671 | 0 | 0.057 | 1.454 | 8.835 | 0.116 | 0.847 | 0.039 | 46885 | w  |
|        | 2     |   | 41704 | 61    | 318   | 4545  | 4579  | 18291 | 9     |    |
| TCGA-C | 0.832 |   |       |       |       |       |       |       | 1.158 | lo |
| M-5860 | 87671 | 0 | 0.105 | 0.933 | 0.532 | 0.138 | 0.444 | 0.052 | 64562 | w  |
|        | 2     |   | 4009  | 4308  | 5664  | 8529  | 1655  | 74749 | 9     |    |
| TCGA-C | 0.838 |   |       |       |       |       |       |       | 2.193 | hi |
| A-6718 | 35616 | 1 | 0.142 | 1.706 | 7.886 | 0.568 | 2.048 | 0.561 | 53958 | gh |
|        | 4     |   | 1226  | 505   | 636   | 9988  | 912   | 5108  | 9     |    |
| TCGA-A | 0.838 | 1 | 0.087 | 0.304 | 0.975 | 0.179 | 0.456 | 0.922 | 2.414 | hi |

|                  |                     |   |                |               |                |                |               |                |                     |      |
|------------------|---------------------|---|----------------|---------------|----------------|----------------|---------------|----------------|---------------------|------|
| A-3848           | 35616<br>4          |   | 79901          | 258           | 9815           | 0934           | 1521          | 7122           | 07207<br>6          | gh   |
| TCGA-A<br>A-3811 | 0.838<br>35616<br>4 | 1 | 0.108<br>603   | 0.903<br>9822 | 1.807<br>632   | 0.415<br>368   | 0.602<br>9593 | 0              | 1.132<br>82758<br>7 | low  |
| TCGA-D<br>5-6922 | 0.843<br>83561<br>6 | 0 | 0.211<br>3454  | 3.421<br>956  | 1.607<br>818   | 0.236<br>1389  | 1.568<br>903  | 0.035<br>65179 | 1.456<br>53416<br>2 | high |
| TCGA-D<br>5-7000 | 0.854<br>79452<br>1 | 0 | 0.072<br>26165 | 0.570<br>3896 | 0.657<br>2183  | 0.239<br>5253  | 0.473<br>4578 | 0.144<br>6523  | 1.236<br>48501      | low  |
| TCGA-A<br>6-6649 | 0.898<br>63013<br>7 | 0 | 0.104<br>6474  | 1.727<br>691  | 10.57<br>518   | 0.883<br>547   | 1.106<br>179  | 0.296<br>4361  | 1.650<br>57320<br>5 | high |
| TCGA-A<br>6-3807 | 0.912<br>32876<br>7 | 0 | 0.175<br>4328  | 2.436<br>598  | 3.123<br>579   | 0.426<br>0118  | 0.520<br>8262 | 0.125<br>421   | 1.389<br>49904      | high |
| TCGA-N<br>H-A50U | 0.915<br>06849<br>3 | 1 | 0.073<br>55898 | 2.543<br>516  | 0.117<br>3715  | 0.185<br>0902  | 0.506<br>2066 | 0.087<br>18704 | 1.328<br>65466<br>7 | high |
| TCGA-A<br>A-3680 | 0.917<br>80821<br>9 | 1 | 0.061<br>98283 | 2.729<br>684  | 8.142<br>805   | 0.553<br>1457  | 1.321<br>65   | 0              | 1.346<br>07500<br>2 | high |
| TCGA-C<br>M-5861 | 0.917<br>80821<br>9 | 0 | 0.116<br>3387  | 0.463<br>4013 | 0.040<br>54015 | 0.046<br>02976 | 1.705<br>597  | 0.602<br>2887  | 1.992<br>67381<br>6 | high |
| TCGA-F<br>4-6461 | 0.926<br>02739<br>7 | 1 | 0.217<br>2451  | 2.318<br>527  | 29.43<br>078   | 7.136<br>786   | 1.453<br>104  | 0.189<br>0773  | 2.227<br>83569<br>8 | high |
| TCGA-A<br>6-5660 | 0.936<br>98630<br>1 | 0 | 0.077<br>68227 | 0.464<br>1371 | 0.406<br>0453  | 0.109<br>2808  | 0.477<br>8152 | 0.040<br>21634 | 1.112<br>62824<br>4 | low  |
| TCGA-D<br>5-6932 | 0.947<br>94520<br>5 | 0 | 0.117<br>4913  | 0.560<br>5737 | 2.581<br>115   | 0.143<br>2751  | 0.621<br>4743 | 0.115<br>0397  | 1.212<br>69182<br>9 | low  |
| TCGA-A<br>6-6137 | 0.953<br>42465<br>8 | 0 | 0.050<br>27089 | 0.129<br>0432 | 1.749<br>827   | 0.413<br>021   | 0.532<br>0293 | 0.125<br>7894  | 1.198<br>06582<br>3 | low  |
| TCGA-D<br>5-5541 | 0.958<br>90411      | 0 | 0.159<br>2223  | 0.798<br>275  | 2.055<br>978   | 0.202<br>9897  | 0.928<br>7139 | 0.066<br>40182 | 1.210<br>01221<br>8 | low  |
| TCGA-D<br>5-6928 | 0.969<br>86301<br>4 | 0 | 0.360<br>7207  | 1.554<br>774  | 27.61<br>16    | 4.361<br>963   | 4.256<br>336  | 0.282<br>9065  | 2.446<br>48431<br>6 | high |

|                  |                     |   |                |               |                |                |                |                |                     |      |
|------------------|---------------------|---|----------------|---------------|----------------|----------------|----------------|----------------|---------------------|------|
| TCGA-A<br>Z-6606 | 0.978<br>08219<br>2 | 1 | 0.072<br>70345 | 0.115<br>8372 | 0.532<br>0294  | 0.233<br>3189  | 0.145<br>4456  | 0.075<br>27758 | 1.103<br>85298<br>3 | low  |
| TCGA-A<br>Y-6386 | 0.986<br>30137      | 0 | 0.041<br>3646  | 0.143<br>3445 | 2.117<br>924   | 0.147<br>658   | 0.300<br>8686  | 0              | 1.040<br>61344<br>9 | low  |
| TCGA-A<br>6-5666 | 0.991<br>78082<br>2 | 0 | 0.084<br>49654 | 0.122<br>0057 | 0.213<br>4707  | 0.138<br>5012  | 0.083<br>61798 | 0              | 1.023<br>74786<br>7 | low  |
| TCGA-T<br>9-A92H | 0.991<br>78082<br>2 | 0 | 0.088<br>22559 | 1.086<br>563  | 0.026<br>22255 | 0.095<br>93647 | 0.148<br>2956  | 0.038<br>95778 | 1.128<br>35991<br>7 | low  |
| TCGA-D<br>5-6931 | 1                   | 0 | 0.281<br>2718  | 1.591<br>375  | 9.368<br>326   | 0.794<br>0174  | 0.566<br>6355  | 0.129<br>2707  | 1.359<br>17569<br>2 | high |
| TCGA-A<br>6-5657 | 1.005<br>47945<br>2 | 0 | 0.153<br>5408  | 2.233<br>023  | 48.24<br>953   | 5.926<br>638   | 1.816<br>468   | 0.083<br>31931 | 1.950<br>16819<br>4 | high |
| TCGA-A<br>Z-6600 | 1.008<br>21917<br>8 | 1 | 0.280<br>2718  | 2.313<br>527  | 10.65<br>244   | 1.400<br>796   | 1.290<br>756   | 0.037<br>23742 | 1.424<br>15693<br>7 | high |
| TCGA-C<br>A-6716 | 1.016<br>43835<br>6 | 0 | 0.020<br>62277 | 2.382<br>199  | 0.364<br>7071  | 0.065<br>729   | 0.223<br>2162  | 0              | 1.184<br>10147<br>1 | low  |
| TCGA-D<br>5-5538 | 1.021<br>91780<br>8 | 0 | 0.086<br>42084 | 0.662<br>6471 | 2.619<br>986   | 0.357<br>1235  | 0.660<br>5858  | 0.089<br>48064 | 1.208<br>62751      | low  |
| TCGA-D<br>5-6920 | 1.032<br>87671<br>2 | 0 | 0.144<br>3683  | 0.881<br>6637 | 1.602<br>42    | 0.280<br>6049  | 0.438<br>5556  | 0.106<br>5963  | 1.221<br>67092<br>2 | low  |
| TCGA-C<br>A-6715 | 1.049<br>31506<br>8 | 0 | 0.211<br>7379  | 0.503<br>9524 | 0.094<br>05381 | 0.020<br>76468 | 0.137<br>0045  | 0.069<br>86598 | 1.117<br>30749<br>6 | low  |
| TCGA-A<br>6-2684 | 1.060<br>27397<br>3 | 0 | 0.124<br>1943  | 2.940<br>943  | 4.016<br>159   | 0.284<br>9996  | 0.436<br>3056  | 0.799<br>1043  | 2.567<br>15019<br>3 | high |
| TCGA-C<br>A-6717 | 1.063<br>01369<br>9 | 0 | 0.204<br>1445  | 3.146<br>836  | 45.77<br>606   | 2.606<br>119   | 2.541<br>654   | 0.041<br>41757 | 1.764<br>19290<br>7 | high |
| TCGA-N<br>H-A6GC | 1.065<br>75342<br>5 | 0 | 0.055<br>12546 | 5.717<br>674  | 0.185<br>6908  | 0.029<br>2827  | 0.477<br>3325  | 0.068<br>96831 | 1.577<br>57375<br>8 | high |
| TCGA-C<br>M-5348 | 1.076<br>71232      | 0 | 0.212<br>8273  | 1.829<br>015  | 2.954<br>019   | 0.418<br>4362  | 1.860<br>639   | 0.615<br>9533  | 2.273<br>16078      | high |

|        |        |   |        |        |        |        |        |        |        |    |
|--------|--------|---|--------|--------|--------|--------|--------|--------|--------|----|
|        | 9      |   |        |        |        |        |        |        |        |    |
| TCGA-A | 1. 082 |   |        |        |        |        |        |        | 1. 344 | hi |
| A-3939 | 19178  | 0 | 0. 127 | 1. 392 | 1. 488 | 0. 179 | 0. 243 | 0. 201 | 77351  | gh |
|        | 1      |   | 2217   | 231    | 64     | 2656   | 515    | 0556   | 1      |    |
| TCGA-A | 1. 087 |   |        |        |        |        |        |        | 1. 174 | lo |
| A-3973 | 67123  | 0 | 0. 064 | 0. 674 | 2. 098 | 0. 173 | 0. 286 | 0. 097 | 07161  | w  |
|        | 3      |   | 89947  | 7063   | 7      | 7523   | 6026   | 43607  | 7      |    |
| TCGA-F | 1. 104 |   |        |        |        |        |        |        | 2. 151 | hi |
| 4-6809 | 10958  | 1 | 0. 264 | 6. 455 | 79. 45 | 2. 645 | 1. 386 | 0. 109 | 72747  | gh |
|        | 9      |   | 8298   | 046    | 262    | 26     | 419    | 431    | 5      |    |
| TCGA-D | 1. 109 |   |        |        |        |        |        |        | 1. 101 | lo |
| M-A1D7 | 58904  | 1 | 0. 055 | 0. 271 | 1. 011 | 0. 085 | 0. 268 | 0. 061 | 66102  | w  |
|        | 1      |   | 14463  | 3116   | 334    | 92578  | 814    | 32648  | 1      |    |
| TCGA-D | 1. 112 |   |        |        |        |        |        |        | 1. 588 | hi |
| 5-6930 | 32876  | 0 | 0. 109 | 1. 959 | 22. 16 | 3. 424 | 2. 162 | 0      | 87858  | gh |
|        | 7      |   | 6483   | 242    | 109    | 822    | 959    |        | 7      |    |
| TCGA-F | 1. 115 |   |        |        |        |        |        |        | 1. 406 | hi |
| 4-6460 | 06849  | 0 | 0. 285 | 2. 669 | 14. 27 | 1. 311 | 0. 733 | 0. 046 | 12861  | gh |
|        | 3      |   | 6212   | 593    | 66     | 664    | 982    | 10905  |        |    |
| TCGA-D | 1. 117 |   |        |        |        |        |        |        | 1. 151 | lo |
| 5-6929 | 80821  | 0 | 0. 136 | 0. 506 | 1. 049 | 0. 200 | 0. 666 | 0. 053 | 97531  | w  |
|        | 9      |   | 0238   | 5222   | 032    | 7955   | 4055   | 74152  |        |    |
| TCGA-F | 1. 120 |   |        |        |        |        |        |        | 1. 460 | hi |
| 4-6569 | 54794  | 0 | 0. 229 | 2. 682 | 14. 93 | 0. 605 | 1. 930 | 0. 035 | 29331  | gh |
|        | 5      |   | 2981   | 825    | 028    | 752    | 231    | 49011  | 9      |    |
| TCGA-D | 1. 126 |   |        |        |        |        |        |        | 1. 120 | lo |
| 5-5540 | 02739  | 0 | 0. 055 | 0. 311 | 1. 023 | 0. 029 | 0. 053 | 0. 098 | 48732  | w  |
|        | 7      |   | 54307  | 3623   | 533    | 15742  | 75308  | 10465  | 5      |    |
| TCGA-F | 1. 136 |   |        |        |        |        |        |        | 1. 653 | hi |
| 4-6463 | 98630  | 0 | 0. 234 | 7. 018 | 2. 130 | 0. 299 | 0. 565 | 0      | 07962  | gh |
|        | 1      |   | 8989   | 286    | 315    | 4685   | 8678   |        | 8      |    |
| TCGA-A | 1. 161 |   |        |        |        |        |        |        | 1. 293 | hi |
| 6-2682 | 64383  | 1 | 0. 057 | 0. 835 | 1. 636 | 0. 073 | 0. 641 | 0. 173 | 85487  | gh |
|        | 6      |   | 84274  | 199    | 689    | 74269  | 1027   | 6831   |        |    |
| TCGA-A | 1. 161 |   |        |        |        |        |        |        | 4. 807 | hi |
| A-A004 | 64383  | 0 | 0. 043 | 0      | 5. 387 | 2. 149 | 1. 609 | 1. 514 | 42665  | gh |
|        | 6      |   | 22404  |        | 225    | 117    | 395    | 191    | 3      |    |
| TCGA-A | 1. 167 |   |        |        |        |        |        |        | 1. 035 | lo |
| A-3667 | 12328  | 0 | 0. 070 | 0. 029 | 0. 611 | 0. 205 | 0. 288 | 0      | 91757  | w  |
|        | 8      |   | 57762  | 11656  | 3353   | 6643   | 1056   |        |        |    |
| TCGA-A | 1. 167 |   |        |        |        |        |        |        | 1. 292 | hi |
| A-A02K | 12328  | 1 | 0. 047 | 0. 068 | 0. 192 | 0. 212 | 0. 250 | 0. 250 | 83300  | gh |
|        | 8      |   | 72172  | 90602  | 9014   | 9385   | 0001   | 7626   | 8      |    |
| TCGA-C | 1. 167 | 0 | 0. 083 | 1. 662 | 1. 172 | 0. 156 | 0. 513 | 0. 197 | 1. 385 | hi |



|                  |                     |   |                |                |                |                |                |                |                     |          |
|------------------|---------------------|---|----------------|----------------|----------------|----------------|----------------|----------------|---------------------|----------|
| M-5868           | 12328<br>8          |   | 18532          | 608            | 461            | 2864           | 6901           | 1937           | 64551               | gh       |
| TCGA-D<br>M-A288 | 1.169<br>86301<br>4 | 1 | 0.039<br>96021 | 0.471<br>2091  | 0              | 0.216<br>5144  | 0.164<br>3577  | 0.249<br>9742  | 1.316<br>70463<br>9 | hi<br>gh |
| TCGA-C<br>M-6163 | 1.169<br>86301<br>4 | 0 | 0.131<br>7081  | 1.528<br>577   | 4.570<br>538   | 0.716<br>0035  | 0.768<br>1988  | 0.037<br>30914 | 1.253<br>12775<br>2 | lo<br>w  |
| TCGA-D<br>5-6924 | 1.191<br>78082<br>2 | 0 | 0.310<br>4612  | 2.017<br>256   | 1.481<br>539   | 0.637<br>6802  | 0.716<br>8774  | 0              | 1.246<br>3942       | lo<br>w  |
| TCGA-C<br>A-6719 | 1.191<br>78082<br>2 | 0 | 0.117<br>4215  | 7.087<br>866   | 2.286<br>388   | 0.266<br>5364  | 0.798<br>5245  | 0.085<br>9948  | 1.811<br>73220<br>2 | hi<br>gh |
| TCGA-A<br>U-3779 | 1.208<br>21917<br>8 | 0 | 0.098<br>07677 | 0.274<br>3778  | 1.672<br>512   | 0.425<br>905   | 0.721<br>8615  | 0.184<br>058   | 1.293<br>07847<br>2 | hi<br>gh |
| TCGA-A<br>6-4105 | 1.210<br>95890<br>4 | 1 | 0.231<br>3015  | 0.543<br>2729  | 2.773<br>744   | 0.141<br>5434  | 0.726<br>3649  | 0.231<br>5079  | 1.357<br>90977<br>3 | hi<br>gh |
| TCGA-A<br>A-3844 | 1.243<br>83561<br>6 | 0 | 0.064<br>99185 | 0.102<br>3737  | 1.671<br>797   | 0.067<br>79206 | 0.312<br>0792  | 0.088<br>70433 | 1.119<br>76818      | lo<br>w  |
| TCGA-A<br>A-A01C | 1.252<br>05479<br>5 | 0 | 0.112<br>7067  | 0.940<br>2683  | 0.253<br>1026  | 0.079<br>82657 | 0.693<br>9947  | 0              | 1.122<br>66414<br>7 | lo<br>w  |
| TCGA-A<br>A-A017 | 1.252<br>05479<br>5 | 0 | 0.092<br>05439 | 0.814<br>1261  | 0.813<br>9764  | 0.110<br>0236  | 0.572<br>9163  | 0.086<br>378   | 1.193<br>46216<br>2 | lo<br>w  |
| TCGA-A<br>A-3679 | 1.252<br>05479<br>5 | 0 | 0.056<br>93008 | 0.234<br>8631  | 1.972<br>488   | 0.072<br>57916 | 0.492<br>9588  | 0.122<br>1019  | 1.178<br>07386<br>7 | lo<br>w  |
| TCGA-A<br>6-5656 | 1.265<br>75342<br>5 | 0 | 0.173<br>3165  | 0.213<br>1793  | 0.356<br>778   | 0.106<br>3873  | 0.519<br>7046  | 0.337<br>305   | 1.433<br>48810<br>5 | hi<br>gh |
| TCGA-A<br>6-2685 | 1.271<br>23287<br>7 | 0 | 0.551<br>995   | 2.721<br>183   | 15.04<br>425   | 0.973<br>8468  | 1.390<br>469   | 0              | 1.405<br>97768<br>7 | hi<br>gh |
| TCGA-A<br>D-6888 | 1.293<br>15068<br>5 | 1 | 0.026<br>70162 | 0.051<br>40642 | 0.067<br>45852 | 0.045<br>38856 | 0.055<br>87571 | 0.066<br>8136  | 1.072<br>07492<br>5 | lo<br>w  |
| TCGA-D<br>5-6541 | 1.298<br>63013<br>7 | 0 | 0.127<br>47    | 2.133<br>894   | 0.905<br>7319  | 0.330<br>0968  | 0.888<br>1859  | 0.388<br>7316  | 1.754<br>59057<br>5 | hi<br>gh |

|                  |                     |   |                |               |               |                |               |                |                     |      |
|------------------|---------------------|---|----------------|---------------|---------------|----------------|---------------|----------------|---------------------|------|
| TCGA-C<br>K-4952 | 1.301<br>36986<br>3 | 0 | 0.081<br>3295  | 0.322<br>94   | 0.128<br>4184 | 0.081<br>00433 | 0.871<br>4893 | 0.076<br>31444 | 1.169<br>18761      | low  |
| TCGA-A<br>Y-5543 | 1.312<br>32876<br>7 | 0 | 0.039<br>55567 | 0.114<br>2299 | 3.530<br>959  | 0.420<br>2402  | 0.218<br>828  | 0.164<br>9624  | 1.212<br>70383<br>3 | low  |
| TCGA-F<br>4-6806 | 1.317<br>80821<br>9 | 0 | 0.065<br>90157 | 1.106<br>19   | 1.956<br>289  | 1.218<br>243   | 0.403<br>0167 | 0.061<br>83785 | 1.244<br>10492<br>6 | low  |
| TCGA-A<br>A-3833 | 1.328<br>76712<br>3 | 0 | 0.197<br>3173  | 1.617<br>548  | 4.438<br>251  | 0.494<br>998   | 4.574<br>571  | 0.382<br>2453  | 2.218<br>39145<br>2 | high |
| TCGA-A<br>6-2686 | 1.336<br>98630<br>1 | 0 | 0.254<br>3952  | 0.635<br>1654 | 12.85<br>4    | 0.456<br>0805  | 1.514<br>434  | 0.517<br>2013  | 1.897<br>31315<br>1 | high |
| TCGA-A<br>A-3971 | 1.339<br>72602<br>7 | 0 | 0.434<br>3657  | 0.803<br>5826 | 3.566<br>467  | 0.925<br>8262  | 0.499<br>532  | 0              | 1.159<br>97465<br>4 | low  |
| TCGA-D<br>5-6540 | 1.345<br>20547<br>9 | 0 | 0.071<br>63947 | 0.488<br>2424 | 0.115<br>8328 | 0.062<br>10569 | 1.593<br>002  | 0.387<br>1983  | 1.635<br>42996<br>2 | high |
| TCGA-F<br>4-6807 | 1.353<br>42465<br>8 | 0 | 0.206<br>5016  | 5.117<br>851  | 25.69<br>579  | 1.202<br>376   | 1.910<br>867  | 0.138<br>8189  | 1.923<br>91360<br>4 | high |
| TCGA-F<br>4-6805 | 1.358<br>90411      | 0 | 0.144<br>9514  | 2.890<br>295  | 8.091<br>338  | 0.800<br>7825  | 0.992<br>156  | 0.103<br>6291  | 1.478<br>79109<br>5 | high |
| TCGA-A<br>Y-4070 | 1.358<br>90411      | 1 | 0.335<br>3782  | 0.345<br>8979 | 4.418<br>033  | 0.565<br>0002  | 0.601<br>5525 | 0.449<br>568   | 1.654<br>88618<br>1 | high |
| TCGA-A<br>6-2672 | 1.378<br>08219<br>2 | 0 | 0.579<br>8685  | 0.117<br>9267 | 1.072<br>936  | 0.968<br>3318  | 1.810<br>422  | 1.471<br>401   | 4.518<br>92906<br>3 | high |
| TCGA-N<br>H-A8F8 | 1.4                 | 1 | 0.201<br>5188  | 1.545<br>51   | 5.441<br>676  | 0.336<br>9348  | 0.663<br>6553 | 0              | 1.184<br>10943<br>1 | low  |
| TCGA-A<br>A-3866 | 1.419<br>17808<br>2 | 0 | 0.155<br>7763  | 0.328<br>7402 | 2.664<br>036  | 0.504<br>1295  | 0.814<br>5102 | 0              | 1.116<br>31685<br>1 | low  |
| TCGA-A<br>A-3846 | 1.419<br>17808<br>2 | 0 | 0.118<br>0382  | 0.448<br>5184 | 0.565<br>0293 | 0.182<br>1659  | 0.312<br>0081 | 0.093<br>27124 | 1.157<br>35010<br>2 | low  |
| TCGA-D<br>5-6538 | 1.427<br>39726      | 0 | 0.036<br>54631 | 0.851<br>8536 | 0.158<br>28   | 0.066<br>56034 | 0.146<br>9256 | 0.039<br>1917  | 1.108<br>57009      | low  |

|        |       |   |       |       |       |       |       |       |       |    |
|--------|-------|---|-------|-------|-------|-------|-------|-------|-------|----|
|        |       |   |       |       |       |       |       |       | 5     |    |
| TCGA-A | 1.430 |   | 0.191 | 0.553 | 1.877 | 0.155 | 0.814 | 0.087 | 1.202 | lo |
| 6-2680 | 13698 | 0 | 583   | 2584  | 38    | 4291  | 3795  | 16088 | 14823 | w  |
|        | 6     |   |       |       |       |       |       |       | 1     |    |
| TCGA-A | 1.432 |   | 0.561 | 3.144 | 2.160 | 1.941 | 0.760 | 0.200 | 1.728 | hi |
| 6-2674 | 87671 | 0 | 1118  | 335   | 127   | 668   | 6146  | 5759  | 81517 | gh |
|        | 2     |   |       |       |       |       |       |       |       |    |
| TCGA-C | 1.463 |   | 0.066 | 1.111 | 7.321 | 0.619 | 0.682 | 0.039 | 1.208 | lo |
| K-4947 | 01369 | 0 | 34871 | 301   | 742   | 1753  | 5237  | 84475 | 49703 | w  |
|        | 9     |   |       |       |       |       |       |       | 8     |    |
| TCGA-D | 1.479 |   | 0.087 | 1.088 | 1.432 | 0.173 | 0.390 | 0.042 | 1.156 | lo |
| 5-6531 | 45205 | 0 | 85938 | 552   | 042   | 4354  | 2046  | 55054 | 72003 | w  |
|        | 5     |   |       |       |       |       |       |       | 5     |    |
| TCGA-A | 1.482 |   | 0.060 | 0.161 | 1.883 | 0.083 | 0.189 | 0.069 | 1.096 | lo |
| 6-2677 | 19178 | 0 | 56809 | 4555  | 301   | 15696 | 6126  | 94861 | 63575 | w  |
|        | 1     |   |       |       |       |       |       |       | 4     |    |
| TCGA-D | 1.487 |   | 0.094 | 2.097 | 0.061 | 0.178 | 0.710 | 0.091 | 1.316 | hi |
| 5-6536 | 67123 | 0 | 60761 | 55    | 68132 | 975   | 8622  | 63744 | 56520 | gh |
|        | 3     |   |       |       |       |       |       |       | 3     |    |
| TCGA-A | 1.498 |   | 0.060 | 0.073 | 1.693 | 0.129 | 0.369 |       | 1.040 | lo |
| A-3831 | 63013 | 0 | 94975 | 33845 | 807   | 5063  | 4356  | 0     | 64754 | w  |
|        | 7     |   |       |       |       |       |       |       | 7     |    |
| TCGA-A | 1.504 |   | 0.225 | 0.883 | 6.429 | 0.431 | 0.383 | 0.241 | 1.388 | hi |
| A-3875 | 10958 | 0 | 5107  | 8201  | 772   | 2495  | 5665  | 8342  | 19485 | gh |
|        | 9     |   |       |       |       |       |       |       | 5     |    |
| TCGA-A | 1.512 |   | 0.040 | 1.374 | 9.520 | 0.511 | 1.050 | 0.225 | 1.478 | hi |
| 6-2681 | 32876 | 0 | 09123 | 846   | 868   | 116   | 131   | 7144  | 07576 | gh |
|        | 7     |   |       |       |       |       |       |       | 9     |    |
| TCGA-D | 1.520 |   | 0.073 | 0.311 | 0.558 | 0.117 | 0.139 | 0.197 | 1.237 | lo |
| 5-6532 | 54794 | 0 | 68769 | 596   | 4901  | 4289  | 0066  | 5539  | 34780 | w  |
|        | 5     |   |       |       |       |       |       |       | 5     |    |
| TCGA-D | 1.561 |   | 0.020 | 3.736 | 0.032 | 0.057 | 0.244 | 0.120 | 1.435 | hi |
| M-A1D6 | 64383 | 1 | 84139 | 181   | 40205 | 22837 | 3232  | 3461  | 19224 | gh |
|        | 6     |   |       |       |       |       |       |       | 5     |    |
| TCGA-A | 1.583 |   | 0.150 | 0.260 | 1.264 | 0.153 | 0.260 |       | 1.048 | lo |
| A-3688 | 56164 | 0 | 1445  | 1548  | 409   | 1333  | 0209  | 0     | 87056 | w  |
|        | 4     |   |       |       |       |       |       |       | 8     |    |
| TCGA-A | 1.586 |   | 0.231 | 0.525 | 2.114 | 0.924 | 2.997 | 0.112 | 1.492 | hi |
| A-3713 | 30137 | 0 | 6339  | 065   | 256   | 0217  | 8     | 1809  | 24628 | gh |
|        |       |   |       |       |       |       |       |       | 4     |    |
| TCGA-A | 1.586 |   | 0.189 | 0.285 | 6.253 | 0.305 | 2.279 | 1.858 | 6.354 | hi |
| A-3715 | 30137 | 1 | 765   | 9174  | 293   | 0397  | 018   | 053   | 79637 | gh |
|        |       |   |       |       |       |       |       |       | 5     |    |
| TCGA-A | 1.589 | 0 | 0.072 | 0.587 | 5.106 | 1.146 | 0.352 | 0.295 | 1.472 | hi |

|                  |                     |   |                |               |               |               |                |                |                     |          |
|------------------|---------------------|---|----------------|---------------|---------------|---------------|----------------|----------------|---------------------|----------|
| A-3530           | 04109<br>6          |   | 18429          | 4661          | 226           | 148           | 2982           | 5629           | 26516<br>9          | gh       |
| TCGA-A<br>A-3986 | 1.589<br>04109<br>6 | 0 | 0.112<br>8028  | 0.586<br>3588 | 25.02<br>152  | 1.315<br>864  | 1.059<br>786   | 0.169<br>3552  | 1.405<br>61061<br>1 | hi<br>gh |
| TCGA-N<br>H-A50V | 1.610<br>95890<br>4 | 0 | 0.089<br>88767 | 0.459<br>8274 | 0.570<br>971  | 0.268<br>4825 | 0.513<br>7039  | 0.038<br>55766 | 1.123<br>24948<br>6 | lo<br>w  |
| TCGA-F<br>4-6856 | 1.619<br>17808<br>2 | 0 | 0.137<br>1537  | 2.284<br>039  | 1.617<br>013  | 0.163<br>1978 | 0.467<br>1292  | 0.205<br>9141  | 1.450<br>13636<br>5 | hi<br>gh |
| TCGA-D<br>5-5539 | 1.632<br>87671<br>2 | 0 | 0.099<br>73742 | 2.747<br>908  | 4.630<br>891  | 0.611<br>7113 | 0.550<br>8549  | 0.202<br>3508  | 1.531<br>70449<br>3 | hi<br>gh |
| TCGA-C<br>M-4751 | 1.663<br>01369<br>9 | 0 | 0.121<br>7985  | 2.003<br>348  | 8.829<br>931  | 1.009<br>312  | 1.618<br>667   | 0.357<br>7711  | 1.850<br>73926<br>7 | hi<br>gh |
| TCGA-D<br>5-6529 | 1.682<br>19178<br>1 | 0 | 0.138<br>1533  | 0.674<br>6099 | 3.223<br>752  | 0.742<br>9451 | 1.083<br>17    | 0.188<br>559   | 1.390<br>65723<br>9 | hi<br>gh |
| TCGA-D<br>5-6530 | 1.701<br>36986<br>3 | 0 | 0.092<br>02224 | 0.137<br>1583 | 3.989<br>716  | 0.359<br>5214 | 1.056<br>432   | 0.044<br>56662 | 1.156<br>61456<br>1 | lo<br>w  |
| TCGA-A<br>A-3955 | 1.747<br>94520<br>5 | 0 | 0.093<br>17108 | 0.317<br>9822 | 0.513<br>5692 | 0.118<br>7822 | 0.124<br>6827  | 0              | 1.038<br>69694      | lo<br>w  |
| TCGA-C<br>K-5916 | 1.761<br>64383<br>6 | 1 | 0.051<br>8895  | 1.395<br>458  | 5.538<br>67   | 0.285<br>2848 | 2.642<br>518   | 0.194<br>7593  | 1.591<br>76207<br>7 | hi<br>gh |
| TCGA-A<br>6-2671 | 1.775<br>34246<br>6 | 0 | 0.143<br>4276  | 0.971<br>2138 | 1.849<br>251  | 0.138<br>7163 | 0.817<br>9693  | 0.297<br>0116  | 1.483<br>00917      | hi<br>gh |
| TCGA-A<br>D-6548 | 1.780<br>82191<br>8 | 0 | 0.148<br>4775  | 1.209<br>011  | 5.682<br>011  | 0.729<br>2372 | 0.552<br>2057  | 0.073<br>08688 | 1.250<br>55871<br>8 | lo<br>w  |
| TCGA-A<br>A-3968 | 1.832<br>87671<br>2 | 0 | 0.167<br>0256  | 0.500<br>8927 | 3.960<br>034  | 0.384<br>9265 | 0.717<br>5767  | 0              | 1.114<br>55994<br>7 | lo<br>w  |
| TCGA-A<br>A-A02R | 1.835<br>61643<br>8 | 1 | 0.038<br>83222 | 1.233<br>548  | 3.251<br>483  | 0.212<br>1708 | 5.471<br>251   | 0.583<br>003   | 2.702<br>27921<br>4 | hi<br>gh |
| TCGA-C<br>M-4746 | 1.915<br>06849<br>3 | 0 | 0.028<br>99455 | 0.100<br>4775 | 0.293<br>0054 | 0             | 0.075<br>31933 | 0              | 1.012<br>69040<br>6 | lo<br>w  |

|                  |                     |   |                |               |                |                |               |                |                     |      |
|------------------|---------------------|---|----------------|---------------|----------------|----------------|---------------|----------------|---------------------|------|
| TCGA-A<br>A-3941 | 2                   | 0 | 0.037<br>96108 | 0.749<br>1041 | 1.918<br>085   | 0.217<br>7816  | 0.816<br>2859 | 0.094<br>98737 | 1.223<br>64266<br>6 | low  |
| TCGA-A<br>A-3979 | 2                   | 0 | 0.068<br>94317 | 0.066<br>3653 | 0.580<br>5896  | 0.058<br>59628 | 0.114<br>4212 | 0.345<br>0234  | 1.381<br>77577<br>2 | high |
| TCGA-A<br>A-3950 | 2                   | 0 | 0.056<br>50165 | 0.265<br>1463 | 1.855<br>683   | 0.090<br>04118 | 0.770<br>5671 | 0.318<br>1053  | 1.433<br>28662<br>8 | high |
| TCGA-A<br>A-3867 | 2.002<br>73972<br>6 | 0 | 0.241<br>2969  | 1.064<br>592  | 10.09<br>241   | 0.469<br>9829  | 0.522<br>3488 | 0              | 1.148<br>36431<br>6 | low  |
| TCGA-D<br>M-A0XD | 2.035<br>61643<br>8 | 1 | 0.063<br>52449 | 3.551<br>023  | 0.137<br>5605  | 0.153<br>2954  | 0.390<br>9354 | 0.238<br>4294  | 1.601<br>75034<br>8 | high |
| TCGA-A<br>6-A566 | 2.076<br>71232<br>9 | 1 | 0.373<br>9816  | 1.385<br>653  | 1.283<br>53    | 0.265<br>3789  | 1.729<br>138  | 0.105<br>9383  | 1.389<br>38766<br>2 | high |
| TCGA-A<br>A-3819 | 2.084<br>93150<br>7 | 0 | 0.143<br>8121  | 0.775<br>2351 | 2.761<br>267   | 0.342<br>2413  | 0.253<br>2054 | 0.071<br>97023 | 1.165<br>62926<br>4 | low  |
| TCGA-A<br>D-6895 | 2.090<br>41095<br>9 | 0 | 0.171<br>91    | 1.691<br>283  | 5.623<br>955   | 0.438<br>3301  | 2.495<br>251  | 0.218<br>7247  | 1.658<br>52121<br>4 | high |
| TCGA-A<br>A-A01X | 2.167<br>12328<br>8 | 0 | 0.055<br>99434 | 0.352<br>8042 | 8.179<br>143   | 0.759<br>2895  | 0.401<br>1083 | 0.229<br>2721  | 1.345<br>89598<br>3 | high |
| TCGA-A<br>A-3949 | 2.167<br>12328<br>8 | 0 | 0.234<br>4043  | 2.577<br>499  | 9.839<br>551   | 0.333<br>3192  | 1.600<br>35   | 0              | 1.352<br>39849<br>3 | high |
| TCGA-A<br>D-6965 | 2.205<br>47945<br>2 | 0 | 0.070<br>83303 | 2.405<br>939  | 0.886<br>2355  | 0.580<br>5243  | 0.449<br>7861 | 0              | 1.239<br>82802<br>5 | low  |
| TCGA-D<br>M-A28A | 2.205<br>47945<br>2 | 1 | 0.073<br>54111 | 1.395<br>6    | 0.026<br>54187 | 0.080<br>36251 | 0.475<br>3213 | 0.315<br>4574  | 1.502<br>28432<br>3 | high |
| TCGA-A<br>A-3982 | 2.252<br>05479<br>5 | 0 | 0.131<br>8128  | 0.456<br>783  | 4.329<br>126   | 0.630<br>1717  | 0.918<br>8026 | 0              | 1.140<br>73046<br>3 | low  |
| TCGA-A<br>A-3994 | 2.252<br>05479<br>5 | 0 | 0.041<br>01432 | 0.693<br>7331 | 0.473<br>6819  | 0.082<br>16753 | 0.750<br>8756 | 0              | 1.107<br>63295<br>8 | low  |
| TCGA-A<br>A-3869 | 2.252<br>05479      | 1 | 0.092<br>44156 | 0.157<br>0325 | 2.857<br>465   | 0.201<br>0418  | 0.541<br>4832 | 0.163<br>2777  | 1.229<br>94436      | low  |

|        |        |   |        |        |        |        |        |        |        |    |
|--------|--------|---|--------|--------|--------|--------|--------|--------|--------|----|
|        | 5      |   |        |        |        |        |        |        | 2      |    |
| TCGA-A | 2. 257 |   |        |        |        |        |        |        | 1. 847 | hi |
| U-6004 | 53424  | 0 | 0. 075 | 0. 361 | 3. 442 | 1. 485 | 1. 093 | 0. 488 | 24882  | gh |
|        | 7      |   | 1509   | 7046   | 795    | 033    | 232    | 9167   | 1      |    |
| TCGA-G | 2. 350 |   |        |        |        |        |        |        | 1. 075 | lo |
| 4-6294 | 68493  | 1 | 0. 040 | 0. 203 | 0. 137 | 0. 179 | 0. 183 | 0. 040 | 19947  | w  |
|        | 2      |   | 71584  | 8058   | 1518   | 9474   | 3308   | 75217  | 5      |    |
| TCGA-A | 2. 498 |   |        |        |        |        |        |        | 1. 666 | hi |
| A-3870 | 63013  | 0 | 0. 058 | 1. 644 | 7. 830 | 0. 561 | 1. 982 | 0. 264 | 23700  | gh |
|        | 7      |   | 70044  | 312    | 231    | 2712   | 325    | 3877   | 2      |    |
| TCGA-A | 2. 504 |   |        |        |        |        |        |        | 1. 131 | lo |
| A-3862 | 10958  | 0 | 0. 098 | 0. 972 | 1. 245 | 0. 324 | 0. 597 | 0      | 40377  | w  |
|        | 9      |   | 58925  | 7546   | 371    | 6984   | 5805   |        | 7      |    |
| TCGA-A | 2. 504 |   |        |        |        |        |        |        | 1. 164 | lo |
| A-3861 | 10958  | 0 | 0. 052 | 0. 171 | 3. 986 | 0. 351 | 0. 309 | 0. 111 | 89027  | w  |
|        | 9      |   | 09714  | 94     | 125    | 0651   | 3327   | 7363   | 7      |    |
| TCGA-A | 2. 583 |   |        |        |        |        |        |        | 1. 669 | hi |
| A-3877 | 56164  | 0 | 0. 118 | 0. 837 | 1. 016 | 0. 196 | 1. 850 | 0. 355 | 42259  | gh |
|        | 4      |   | 3705   | 4919   | 767    | 181    | 075    | 4283   | 5      |    |
| TCGA-A | 2. 583 |   |        |        |        |        |        |        | 1. 041 | lo |
| A-A01I | 56164  | 0 | 0. 031 | 0. 399 | 0. 405 | 0. 051 | 0. 162 | 0      | 00642  | w  |
|        | 4      |   | 20316  | 0555   | 4174   | 14618  | 1133   |        | 8      |    |
| TCGA-A | 2. 589 |   |        |        |        |        |        |        | 1. 089 | lo |
| A-3858 | 04109  | 0 | 0. 065 | 0. 467 | 1. 877 | 0. 145 | 0. 653 | 0      | 39584  | w  |
|        | 6      |   | 91429  | 2203   | 188    | 1478   | 7719   |        | 7      |    |
| TCGA-A | 2. 589 |   |        |        |        |        |        |        | 1. 243 | lo |
| A-3860 | 04109  | 0 | 0. 193 | 0. 645 | 5. 734 | 0. 723 | 0. 731 | 0. 090 | 21081  | w  |
|        | 6      |   | 1821   | 0445   | 611    | 4605   | 8358   | 6349   |        |    |
| TCGA-Q | 2. 608 |   |        |        |        |        |        |        | 2. 180 | hi |
| G-A5Z2 | 21917  | 0 | 0. 130 | 0. 169 | 5. 280 | 8. 301 | 1. 008 | 0. 294 | 31096  | gh |
|        | 8      |   | 6215   | 7456   | 002    | 375    | 524    | 1607   | 8      |    |
| TCGA-A | 2. 671 |   |        |        |        |        |        |        | 1. 373 | hi |
| A-3855 | 23287  | 0 | 0. 135 | 0. 948 | 1. 159 | 0. 232 | 0. 469 | 0. 234 | 62925  | gh |
|        | 7      |   | 6084   | 9095   | 565    | 7294   | 6943   | 9162   | 1      |    |
| TCGA-A | 2. 745 |   |        |        |        |        |        |        | 1. 328 | hi |
| Z-4615 | 20547  | 0 | 0. 148 | 1. 155 | 0. 748 | 0. 075 | 1. 937 | 0. 074 | 21674  | gh |
|        | 9      |   | 1465   | 117    | 5496   | 54772  | 033    | 13933  | 1      |    |
| TCGA-A | 2. 750 |   |        |        |        |        |        |        | 1. 079 | lo |
| A-3947 | 68493  | 0 | 0. 164 | 0. 511 | 1. 022 | 0. 064 | 0. 503 | 0      | 45225  | w  |
|        | 2      |   | 4132   | 3195   | 451    | 49459  | 7555   |        | 3      |    |
| TCGA-A | 2. 753 |   |        |        |        |        |        |        | 1. 034 | lo |
| A-A01T | 42465  | 0 | 0. 356 | 0. 107 | 1. 349 | 0. 009 | 0. 218 | 0      | 85686  | w  |
|        | 8      |   | 1553   | 1369   | 677    | 45950  | 4469   |        | 7      |    |
| TCGA-A | 2. 753 | 0 | 0. 119 | 0. 268 | 12. 76 | 0. 712 | 0. 817 | 0. 099 | 1. 230 | lo |

|        |            |   |                |               |               |                |               |                |            |    |
|--------|------------|---|----------------|---------------|---------------|----------------|---------------|----------------|------------|----|
| A-3815 | 42465<br>8 |   | 7134           | 8866          | 977           | 2287           | 7626          | 85014          | 50192<br>1 | w  |
| TCGA-A | 2.756      |   |                |               |               |                |               |                | 1.111      | lo |
| A-3851 | 16438<br>4 | 0 | 0.065<br>41745 | 0.841<br>5271 | 6.069<br>9    | 0.454<br>9066  | 0.365<br>6184 | 0              | 67050<br>9 | w  |
| TCGA-F | 2.805      |   |                |               |               |                |               |                | 1.097      | lo |
| 4-6808 | 47945<br>2 | 0 | 0.042<br>39156 | 0.265<br>2422 | 0.321<br>292  | 0.094<br>57743 | 0.327<br>3035 | 0.053<br>03673 | 56226<br>2 | w  |
| TCGA-A | 2.835      |   |                |               |               |                |               |                | 1.127      | lo |
| A-3956 | 61643<br>8 | 0 | 0.347<br>3031  | 0.852<br>5085 | 2.544<br>521  | 0.343<br>1472  | 0.526<br>2784 | 0              | 55902<br>4 | w  |
| TCGA-A | 2.838      |   |                |               |               |                |               |                | 1.229      | lo |
| A-3975 | 35616<br>4 | 0 | 0.389<br>4599  | 0.881<br>0091 | 2.886<br>18   | 0.314<br>4598  | 0.500<br>2306 | 0.097<br>45184 | 10379      | w  |
| TCGA-A | 2.915      |   |                |               |               |                |               |                | 1.894      | hi |
| A-A010 | 06849<br>3 | 0 | 0.107<br>6864  | 0.984<br>7688 | 1.450<br>971  | 0.343<br>2187  | 1.103<br>41   | 0.538<br>9124  | 33451<br>2 | gh |
| TCGA-A | 2.917      |   |                |               |               |                |               |                | 1.187      | lo |
| A-3502 | 80821<br>9 | 0 | 0.027<br>80354 | 0.120<br>4377 | 0.070<br>2424 | 0.354<br>4624  | 0.740<br>3106 | 0.104<br>3563  | 33107<br>3 | w  |
| TCGA-A | 2.917      |   |                |               |               |                |               |                | 2.513      | hi |
| A-A01R | 80821<br>9 | 0 | 0.093<br>77967 | 0.382<br>3333 | 5.128<br>695  | 0.393<br>8383  | 0.926<br>6811 | 0.911<br>0266  | 34404<br>5 | gh |
| TCGA-A | 2.920      |   |                |               |               |                |               |                | 1.665      | hi |
| A-3812 | 54794<br>5 | 0 | 0.088<br>27128 | 0.424<br>8536 | 3.568<br>114  | 0.125<br>0394  | 1.155<br>007  | 0.441<br>7502  | 32470<br>5 | gh |
| TCGA-F | 2.950      |   |                |               |               |                |               |                | 1.380      | hi |
| 4-6855 | 68493<br>2 | 0 | 0.095<br>4721  | 3.286<br>426  | 0.656<br>0617 | 0.228<br>8255  | 0.720<br>878  | 0.057<br>33437 | 55925<br>3 | gh |
| TCGA-G | 2.983      |   |                |               |               |                |               |                | 2.288      | hi |
| 4-6586 | 56164<br>4 | 0 | 0.032<br>03848 | 0.316<br>1154 | 1.834<br>674  | 0.292<br>7246  | 0.642<br>6941 | 0.841<br>7606  | 50336<br>1 | gh |
| TCGA-F | 2.989      |   |                |               |               |                |               |                | 1.685      | hi |
| 4-6703 | 04109<br>6 | 0 | 0.487<br>5946  | 3.398<br>032  | 15.45<br>413  | 0.819<br>4158  | 1.603<br>348  | 0.151<br>2489  | 77208<br>9 | gh |
| TCGA-G | 2.994      |   |                |               |               |                |               |                | 1.281      | hi |
| 4-6314 | 52054<br>8 | 0 | 0.180<br>0637  | 2.717<br>145  | 11.63<br>544  | 0.274<br>8254  | 0.770<br>8036 | 0              | 00804<br>8 | gh |
| TCGA-D | 2.997      |   |                |               |               |                |               |                | 1.219      | lo |
| M-A28F | 26027<br>4 | 1 | 0.044<br>77135 | 1.243<br>665  | 3.705<br>686  | 0.250<br>0569  | 0.280<br>6036 | 0.096<br>02421 | 15735<br>1 | w  |
| TCGA-A |            |   |                |               |               |                |               |                | 1.142      | lo |
| A-3692 | 3          | 1 | 0.115<br>0712  | 0.398<br>7668 | 4.511<br>882  | 0.240<br>5917  | 0.422<br>4753 | 0.069<br>10433 | 74901      | w  |
| TCGA-A | 3.002      | 0 | 0.070          | 0.271         | 1.138         | 0.047          | 0.878         | 0              | 1.087      | lo |

|                  |                     |   |                |                |               |                |               |                |                     |          |
|------------------|---------------------|---|----------------|----------------|---------------|----------------|---------------|----------------|---------------------|----------|
| A-3854           | 73972<br>6          |   | 41506          | 1286           | 531           | 87782          | 0047          |                | 75085<br>7          | w        |
| TCGA-G<br>4-6315 | 3.060<br>27397<br>3 | 0 | 0.062<br>56573 | 0.152<br>1507  | 3.061<br>47   | 0.705<br>2811  | 0.250<br>9195 | 0.098<br>87614 | 1.166<br>88733<br>6 | lo<br>w  |
| TCGA-A<br>A-3841 | 3.079<br>45205<br>5 | 0 | 0.112<br>5143  | 0.252<br>7169  | 6.316<br>76   | 0.844<br>7167  | 0.963<br>4383 | 0.375<br>3822  | 1.593<br>26122<br>6 | hi<br>gh |
| TCGA-A<br>A-3842 | 3.084<br>93150<br>7 | 0 | 0.036<br>5102  | 0.711<br>6871  | 0.276<br>7163 | 0.058<br>18276 | 0.537<br>4424 | 0.137<br>0354  | 1.231<br>50518<br>4 | lo<br>w  |
| TCGA-A<br>A-A01Z | 3.084<br>93150<br>7 | 0 | 0.014<br>01261 | 0.424<br>893   | 0.354<br>0124 | 0.142<br>9155  | 0.345<br>8062 | 0.105<br>1884  | 1.164<br>42392<br>4 | lo<br>w  |
| TCGA-A<br>A-3495 | 3.087<br>67123<br>3 | 0 | 0.133<br>5751  | 0.243<br>6263  | 4.404<br>765  | 0.241<br>9946  | 0.346<br>9888 | 0.105<br>5481  | 1.163<br>36012<br>3 | lo<br>w  |
| TCGA-A<br>A-3685 | 3.087<br>67123<br>3 | 0 | 0.105<br>2133  | 0.414<br>9978  | 12.00<br>679  | 0.170<br>1219  | 0.311<br>0882 | 0.038<br>52701 | 1.102<br>45473<br>8 | lo<br>w  |
| TCGA-A<br>A-A01P | 3.172<br>60274      | 1 | 0.164<br>2426  | 1.707<br>495   | 5.477<br>205  | 0.523<br>475   | 2.564<br>665  | 0.410<br>9729  | 1.986<br>46071<br>5 | hi<br>gh |
| TCGA-D<br>M-A0XF | 3.183<br>56164<br>4 | 1 | 0.228<br>3545  | 0.223<br>639   | 0.541<br>7948 | 0.068<br>35113 | 0.232<br>121  | 0.178<br>8717  | 1.221<br>19610<br>6 | lo<br>w  |
| TCGA-A<br>A-3837 | 3.249<br>31506<br>8 | 0 | 0.182<br>206   | 2.762<br>441   | 6.674<br>671  | 0.464<br>5823  | 0.532<br>4822 | 0.341<br>941   | 1.724<br>96025<br>5 | hi<br>gh |
| TCGA-A<br>A-A024 | 3.254<br>79452<br>1 | 1 | 0.207<br>6448  | 0.328<br>836   | 0.473<br>8236 | 0.017<br>07888 | 0.179<br>8    | 0              | 1.041<br>71269<br>9 | lo<br>w  |
| TCGA-5<br>M-AATE | 3.287<br>67123<br>3 | 0 | 0.029<br>37654 | 0.387<br>8141  | 0.593<br>7312 | 0.235<br>4102  | 0.334<br>3175 | 0              | 1.063<br>15036<br>8 | lo<br>w  |
| TCGA-A<br>A-A02Y | 3.331<br>50684<br>9 | 0 | 0.018<br>40359 | 0.053<br>14637 | 0.302<br>2144 | 0.049<br>85762 | 0.119<br>5178 | 0              | 1.015<br>14912<br>6 | lo<br>w  |
| TCGA-A<br>A-A02F | 3.331<br>50684<br>9 | 0 | 0.155<br>0041  | 1.256<br>793   | 0.180<br>7384 | 0.022<br>80138 | 0.180<br>6786 | 0              | 1.102<br>44937<br>1 | lo<br>w  |
| TCGA-C<br>K-4950 | 3.361<br>64383<br>6 | 0 | 0.075<br>42059 | 0.804<br>1904  | 2.970<br>49   | 0.638<br>5503  | 0.559<br>2945 | 0.058<br>0676  | 1.194<br>47108<br>9 | lo<br>w  |



|                  |                     |   |                |                |               |                |               |                |                     |          |
|------------------|---------------------|---|----------------|----------------|---------------|----------------|---------------|----------------|---------------------|----------|
| TCGA-A<br>A-A03J | 3.413<br>69863      | 0 | 0.072<br>96567 | 0.386<br>3057  | 1.966<br>286  | 0.317<br>8274  | 0.810<br>8244 | 0.547<br>7308  | 1.797<br>26149<br>7 | hi<br>gh |
| TCGA-A<br>A-A02W | 3.416<br>43835<br>6 | 0 | 0.111<br>1214  | 1.146<br>069   | 1.015<br>995  | 0.161<br>9049  | 0.224<br>514  | 0.158<br>8866  | 1.271<br>98043      | hi<br>gh |
| TCGA-D<br>5-6534 | 3.605<br>47945<br>2 | 0 | 0.274<br>902   | 3.548<br>355   | 59.20<br>153  | 1.311<br>599   | 3.348<br>765  | 0.625<br>3347  | 3.022<br>23872<br>1 | hi<br>gh |
| TCGA-D<br>M-A1DB | 3.693<br>15068<br>5 | 1 | 0.045<br>07719 | 0.052<br>07004 | 0.564<br>8561 | 0.048<br>27321 | 0.224<br>8268 | 0.162<br>4227  | 1.181<br>96976<br>9 | lo<br>w  |
| TCGA-A<br>A-3678 | 3.917<br>80821<br>9 | 0 | 0.069<br>54168 | 0.240<br>9892  | 1.686<br>614  | 0.200<br>9569  | 0.457<br>6438 | 0.069<br>60373 | 1.130<br>01775<br>9 | lo<br>w  |
| TCGA-A<br>A-3675 | 3.920<br>54794<br>5 | 0 | 0.016<br>47271 | 0.251<br>4432  | 0.570<br>739  | 0.048<br>00175 | 0.264<br>8983 | 0.105<br>9905  | 1.140<br>61458      | lo<br>w  |
| TCGA-G<br>4-6627 | 3.928<br>76712<br>3 | 0 | 0.373<br>5522  | 5.045<br>51    | 46.36<br>94   | 2.197<br>431   | 1.502<br>686  | 0.044<br>1597  | 1.821<br>49212<br>3 | hi<br>gh |
| TCGA-A<br>A-3673 | 4.169<br>86301<br>4 | 0 | 0.058<br>56374 | 1.014<br>732   | 5.144<br>263  | 0.648<br>984   | 0.487<br>6006 | 0.067<br>63385 | 1.215<br>16385<br>7 | lo<br>w  |
| TCGA-A<br>Z-4313 | 4.197<br>26027<br>4 | 0 | 0.023<br>70278 | 0.182<br>532   | 1.197<br>646  | 0.030<br>21825 | 0.205<br>2428 | 0.237<br>2393  | 1.269<br>74462<br>8 | hi<br>gh |
| TCGA-A<br>A-3972 | 4.249<br>31506<br>8 | 0 | 0.070<br>88118 | 0.148<br>8673  | 0.390<br>7048 | 0.156<br>0853  | 0.485<br>4296 | 0              | 1.055<br>60737<br>1 | lo<br>w  |
| TCGA-G<br>4-6628 | 4.4                 | 0 | 0.157<br>7678  | 0.485<br>9798  | 9.778<br>546  | 0.536<br>3611  | 1.473<br>127  | 0              | 1.185<br>48152<br>6 | lo<br>w  |
| TCGA-A<br>A-3864 | 4.416<br>43835<br>6 | 0 | 0.075<br>05812 | 0.333<br>4689  | 1.050<br>234  | 0.103<br>0511  | 0.294<br>9681 | 0.086<br>6828  | 1.134<br>91373<br>4 | lo<br>w  |
| TCGA-G<br>4-6304 | 4.468<br>49315<br>1 | 0 | 0.079<br>38186 | 0.275<br>0893  | 1.283<br>514  | 0.047<br>22785 | 0.151<br>2212 | 0.079<br>4527  | 1.109<br>18492<br>6 | lo<br>w  |
| TCGA-A<br>A-3664 | 4.501<br>36986<br>3 | 0 | 0.294<br>552   | 5.050<br>526   | 1.116<br>227  | 0.211<br>2295  | 0.454<br>3134 | 0              | 1.445<br>81340<br>1 | hi<br>gh |
| TCGA-G<br>4-6307 | 4.586<br>30137      | 0 | 0.075<br>35438 | 0.177<br>1247  | 4.197<br>084  | 1.056<br>748   | 0.186<br>6439 | 0.289<br>4085  | 1.403<br>77479      | hi<br>gh |

|        |        |   |        |        |        |        |        |        |        |    |
|--------|--------|---|--------|--------|--------|--------|--------|--------|--------|----|
|        |        |   |        |        |        |        |        |        | 1      |    |
| TCGA-A | 4. 687 |   |        |        |        |        |        |        | 2. 174 | hi |
| 6-A56B | 67123  | 1 | 0. 066 | 1. 409 | 0. 523 | 0. 084 | 1. 293 | 0. 666 | 35525  | gh |
|        | 3      |   | 56134  | 596    | 1628   | 85787  | 599    | 2073   | 3      |    |
| TCGA-A | 4. 835 |   |        |        |        |        |        |        | 1. 113 | lo |
| A-3506 | 61643  | 0 | 0. 061 | 0. 919 | 2. 845 | 0. 312 | 0. 445 | 0      | 95377  | w  |
|        | 8      |   | 20313  | 0689   | 055    | 1071   | 1657   |        | 5      |    |
| TCGA-A | 4. 865 |   |        |        |        |        |        |        | 1. 193 | lo |
| Z-4315 | 75342  | 0 | 0. 041 | 0. 454 | 2. 003 | 0. 183 | 0. 651 | 0. 102 | 39076  | w  |
|        | 5      |   | 02167  | 11     | 639    | 0423   | 2138   | 6457   | 9      |    |
| TCGA-S | 5. 010 |   |        |        |        |        |        |        | 1. 171 | lo |
| S-A7HO | 95890  | 0 | 0. 117 | 0. 562 | 0. 134 | 0. 068 | 0. 136 | 0. 120 | 82366  | w  |
|        | 4      |   | 3682   | 3308   | 7805   | 01395  | 2758   | 1428   | 4      |    |
| TCGA-D | 5. 065 |   |        |        |        |        |        |        | 1. 096 | lo |
| M-A28G | 75342  | 1 | 0. 036 | 0. 201 | 0. 243 | 0. 039 | 0. 166 | 0. 072 | 04815  | w  |
|        | 5      |   | 09613  | 5294   | 1805   | 88254  | 6971   | 25668  | 5      |    |
| TCGA-A | 5. 084 |   |        |        |        |        |        |        | 1. 070 | lo |
| A-3655 | 93150  | 0 | 0. 085 | 0. 561 | 0. 767 | 0. 120 | 0. 341 | 0      | 82619  | w  |
|        | 7      |   | 03173  | 2729   | 2242   | 0203   | 8496   |        | 8      |    |
| TCGA-A | 5. 153 |   |        |        |        |        |        |        | 1. 472 | hi |
| 6-A567 | 42465  | 1 | 0. 030 | 1. 418 | 1. 179 | 0. 360 | 0. 467 | 0. 276 | 52033  | gh |
|        | 8      |   | 70578  | 767    | 134    | 1456   | 9523   | 5986   | 3      |    |
| TCGA-A | 5. 246 |   |        |        |        |        |        |        | 1. 102 | lo |
| A-3509 | 57534  | 0 | 0. 071 | 1. 010 | 0. 442 | 0. 111 | 0. 369 | 0      | 43132  | w  |
|        | 2      |   | 08767  | 653    | 0793   | 5427   | 3298   |        | 7      |    |
| TCGA-A | 5. 331 |   |        |        |        |        |        |        | 1. 175 | lo |
| A-3510 | 50684  | 0 | 0. 156 | 0. 525 | 8. 516 | 0. 338 | 0. 495 | 0. 078 | 83090  | w  |
|        | 9      |   | 0597   | 7855   | 158    | 2281   | 4855   | 09946  | 4      |    |
| TCGA-G | 5. 487 |   |        |        |        |        |        |        | 1. 155 | lo |
| 4-6303 | 67123  | 1 | 0. 063 | 1. 072 | 1. 119 | 0. 246 | 0. 477 | 0. 032 | 95572  | w  |
|        | 3      |   | 00259  | 822    | 669    | 502    | 8184   | 61662  | 5      |    |
| TCGA-A | 5. 632 |   |        |        |        |        |        |        | 1. 364 | hi |
| D-6889 | 87671  | 0 | 0. 071 | 0. 347 | 0. 318 | 0. 029 | 0. 265 | 0. 300 | 91066  | gh |
|        | 2      |   | 599    | 366    | 3603   | 20969  | 3503   | 9841   | 1      |    |
| TCGA-C | 5. 846 |   |        |        |        |        |        |        | 1. 451 | hi |
| K-4951 | 57534  | 1 | 0. 127 | 0. 635 | 0. 982 | 0. 136 | 1. 657 | 0. 230 | 57460  | gh |
|        | 2      |   | 9182   | 3774   | 4379   | 9877   | 039    | 4582   | 4      |    |
| TCGA-G | 6. 213 |   |        |        |        |        |        |        | 3. 114 | hi |
| 4-6299 | 69863  | 0 | 0. 178 | 10. 61 | 4. 011 | 0. 245 | 3. 654 | 0. 219 | 60740  | gh |
|        |        |   | 0459   | 204    | 441    | 5931   | 595    | 1043   | 2      |    |
| TCGA-A | 6. 506 |   |        |        |        |        |        |        | 1. 107 | lo |
| A-3660 | 84931  | 0 | 0. 130 | 0. 395 | 1. 895 | 0. 261 | 0. 275 | 0. 044 | 51786  | w  |
|        | 5      |   | 991    | 4737   | 346    | 8833   | 8298   | 69586  | 1      |    |
| TCGA-D | 6. 780 | 1 | 0. 004 | 0. 109 | 0. 550 | 0. 030 | 0. 272 | 0      | 1. 028 | lo |

|                  |                     |   |                |                |                |                     |                |                |                     |          |
|------------------|---------------------|---|----------------|----------------|----------------|---------------------|----------------|----------------|---------------------|----------|
| M-A28C           | 82191<br>8          |   | 73937<br>1     | 4918           | 7796           | 2107                | 9048           |                | 42669<br>8          | w        |
| TCGA-G<br>4-6297 | 6.865<br>75342<br>5 | 0 | 0.247<br>2662  | 2.715<br>096   | 3.486<br>638   | 0.868<br>73         | 1.003<br>322   | 0              | 1.342<br>76710<br>8 | hi<br>gh |
| TCGA-A<br>A-3697 | 7.087<br>67123<br>3 | 0 | 0.173<br>8229  | 0.379<br>2664  | 1.795<br>608   | 0.325<br>0188       | 0.357<br>8879  | 0              | 1.074<br>56080<br>3 | lo<br>w  |
| TCGA-D<br>M-A1HA | 7.123<br>28767<br>1 | 0 | 0.058<br>09922 | 3.322<br>053   | 0.164<br>3946  | 0.245<br>9113       | 1.074<br>584   | 0.628<br>0315  | 2.351<br>47834      | hi<br>gh |
| TCGA-G<br>4-6625 | 7.649<br>31506<br>8 | 0 | 0.193<br>2422  | 1.424<br>277   | 18.36<br>23    | 2.283<br>436        | 1.356<br>113   | 0.173<br>2071  | 1.597<br>22281<br>1 | hi<br>gh |
| TCGA-D<br>M-A1D4 | 7.728<br>76712<br>3 | 1 | 0.040<br>1842  | 0.051<br>57555 | 0.225<br>6015  | 0.014<br>23059      | 0.463<br>9411  | 0.033<br>51671 | 1.070<br>18005<br>4 | lo<br>w  |
| TCGA-D<br>M-A28M | 7.931<br>50684<br>9 | 0 | 0.022<br>45177 | 0.772<br>1475  | 0.082<br>50441 | 0.013<br>01062      | 0.075<br>99677 | 0              | 1.056<br>63401<br>3 | lo<br>w  |
| TCGA-D<br>M-A28K | 8.186<br>30137      | 0 | 0.082<br>09924 | 0.812<br>8743  | 0.148<br>153   | 0.037<br>38102      | 0.210<br>7308  | 0.220<br>1049  | 1.303<br>93084<br>2 | hi<br>gh |
| TCGA-A<br>Z-6601 | 8.334<br>24657<br>5 | 1 | 0.150<br>6721  | 1.429<br>663   | 16.74<br>885   | 1.711<br>652        | 1.628<br>512   | 0.040<br>39462 | 1.403<br>12397<br>4 | hi<br>gh |
| TCGA-C<br>K-4948 | 8.536<br>98630<br>1 | 0 | 0.093<br>29659 | 0.653<br>4974  | 1.384<br>128   | 0.346<br>7038       | 0.682<br>3814  | 0.149<br>0104  | 1.274<br>49176<br>3 | hi<br>gh |
| TCGA-D<br>M-A28H | 9.756<br>16438<br>4 | 0 | 0.094<br>30115 | 0.292<br>7498  | 1.572<br>39    | 0.168<br>312        | 0.138<br>8145  | 0.070<br>78897 | 1.108<br>50774<br>4 | lo<br>w  |
| TCGA-D<br>M-A0X9 | 9.975<br>34246<br>6 | 0 | 0.023<br>20797 | 0.211<br>3726  | 0.306<br>6917  | 0.050<br>07103      | 0.173<br>1333  | 0.160<br>8139  | 1.186<br>96181<br>8 | lo<br>w  |
| TCGA-D<br>M-A28E | 9.994<br>52054<br>8 | 0 | 0.047<br>19873 | 0.053<br>00623 | 0.344<br>4771  | 0.033<br>42934      | 0.090<br>82105 | 0              | 1.013<br>14891<br>3 | lo<br>w  |
| TCGA-D<br>M-A1D0 | 10.88<br>76712<br>3 | 0 | 0.048<br>91049 | 0.130<br>7824  | 0.054<br>91851 | 0.009<br>23779<br>5 | 0.622<br>7267  | 0.217<br>5739  | 1.280<br>29452<br>5 | hi<br>gh |
| TCGA-D<br>M-A282 | 11.59<br>72602<br>7 | 0 | 0.016<br>1553  | 0.373<br>2297  | 0.093<br>29027 | 0.014<br>71151      | 0.115<br>9081  | 0.069<br>2988  | 1.098<br>84444<br>1 | lo<br>w  |

|        |       |   |       |       |       |       |       |       |       |
|--------|-------|---|-------|-------|-------|-------|-------|-------|-------|
| TCGA-D | 11.69 |   |       |       |       |       |       | 1.062 | 1o    |
| M-A1D9 | 86301 | 0 | 0.041 | 0.300 | 0.114 | 0.060 | 0.167 | 0.028 | 19703 |
|        | 4     |   | 66968 | 837   | 8439  | 36811 | 2886  | 4365  | 5w    |
