# Supplementary material for: Alteration in the Immune Microenvironment Based on APC Status in MSS/pMMR Colon Cancer
Source: Hindawi journal article supplement (doi:10.1155/2022/3592990), 2022-07-27
Supplement: f1 [file 3592990.f1.zip]

## 496 genes related to APC status

| gene          | logFC       | pValue      |
|---------------|-------------|-------------|
| WIF1          | 3.149461469 | 2.51E-07    |
| CALCA         | 3.114956255 | 3.29E-07    |
| PRSS56        | 3.108382806 | 2.35E-06    |
| DKK4          | 3.075787859 | 0.002340537 |
| MAGEB17       | 2.47475576  | 1.37E-11    |
| COL2A1        | 2.323082113 | 5.20E-06    |
| MT3           | 2.02840498  | 4.10E-05    |
| KRT40         | 2.028089611 | 4.02E-05    |
| SPACA3        | 1.963187667 | 5.16E-10    |
| LY6G6F        | 1.932354256 | 2.24E-13    |
| GRPR          | 1.923411005 | 1.64E-05    |
| CPN1          | 1.816904413 | 6.29E-07    |
| NOTUM         | 1.810395752 | 8.11E-08    |
| NKX2-1        | 1.800101008 | 0.000381168 |
| GLYATL2       | 1.752205175 | 8.65E-05    |
| RBP2          | 1.74196789  | 9.52E-10    |
| CALML3        | 1.737659618 | 1.74E-09    |
| DPP10         | 1.732540043 | 0.002724876 |
| LDHC          | 1.725952237 | 0.006795262 |
| TMEM252       | 1.649384032 | 6.07E-06    |
| PAH           | 1.634216447 | 7.73E-09    |
| OBP2B         | 1.634048196 | 0.00035869  |
| CEL           | 1.624909172 | 1.73E-13    |
| STMND1        | 1.621617857 | 7.19E-12    |
| MYH7B         | 1.597473174 | 1.24E-09    |
| NKD1          | 1.590127559 | 1.12E-11    |
| RNF182        | 1.550889916 | 7.55E-06    |
| DRD2          | 1.516689153 | 2.73E-08    |
| NPTX2         | 1.504691364 | 0.008828881 |
| PLA2G12B      | 1.487885651 | 2.46E-08    |
| LY6G6F-LY6G6D | 1.483884225 | 3.05E-13    |
| PTPRO         | 1.463846493 | 2.29E-13    |
| SLC1A7        | 1.445199707 | 1.48E-05    |
| PKLR          | 1.414424446 | 8.32E-07    |
| ZNF541        | 1.405738196 | 8.88E-08    |
| APCDD1        | 1.403267156 | 1.16E-08    |
| NEUROG2       | 1.397246989 | 2.37E-06    |
| DPEP1         | 1.39553697  | 7.85E-12    |
| LY6G6D        | 1.394984245 | 1.57E-12    |
| LY6G6E        | 1.383502802 | 1.13E-10    |
| NODAL         | 1.338491651 | 9.77E-08    |

|            |              |             |
|------------|--------------|-------------|
| KRT23      | 1.336279475  | 2.06E-07    |
| BHLHA9     | 1.32998965   | 4.80E-05    |
| SLC30A2    | 1.321306442  | 4.69E-10    |
| IZUM02     | 1.314520122  | 9.80E-07    |
| R3HDML     | 1.311593347  | 5.46E-11    |
| SLC6A4     | 1.29234907   | 8.35E-09    |
| MAP7D2     | 1.284176033  | 3.80E-06    |
| KRT75      | 1.276057459  | 5.97E-06    |
| KRT83      | 1.25199605   | 0.000744616 |
| LRRC36     | 1.24143571   | 5.19E-12    |
| TNNC2      | 1.21670727   | 1.84E-11    |
| LRRC2      | 1.215913827  | 5.71E-15    |
| ENPP3      | 1.213183493  | 7.14E-07    |
| FAM3B      | 1.212663129  | 3.73E-05    |
| POU5F1B    | 1.2042216    | 4.21E-11    |
| TDGF1      | 1.202894144  | 1.66E-15    |
| ACSL6      | 1.19442214   | 3.20E-10    |
| SULT2A1    | 1.191507183  | 0.001066003 |
| FSTL4      | 1.191489996  | 4.85E-05    |
| UMODL1     | 1.189278067  | 2.65E-09    |
| CBLN1      | 1.184733552  | 5.04E-07    |
| SERPINA7   | 1.184018638  | 3.33E-08    |
| PRDM13     | 1.180385188  | 1.04E-05    |
| SERPINA10  | 1.172646355  | 2.43E-07    |
| GRM8       | 1.172057318  | 7.26E-10    |
| TMEM249    | 1.17178299   | 0.000662403 |
| SLC38A3    | 1.167993756  | 3.14E-05    |
| AFP        | 1.165286204  | 1.15E-05    |
| PIPOX      | 1.161081585  | 0.000154668 |
| IGFL4      | 1.152410217  | 1.17E-07    |
| SLC13A3    | 1.147525158  | 6.15E-05    |
| SLC39A2    | 1.135763546  | 1.10E-06    |
| RPS6KA6    | 1.135399989  | 1.57E-10    |
| RIIAD1     | 1.132473298  | 3.45E-06    |
| RIPPLY3    | 1.12920023   | 5.49E-08    |
| DLX3       | 1.127472564  | 1.27E-08    |
| PRKAA2     | 1.108261874  | 0.001869235 |
| TBX21      | -1.102351689 | 4.27E-08    |
| NFATC1     | -1.104202179 | 1.04E-08    |
| TRNP1      | -1.107023705 | 1.92E-09    |
| FSCN1      | -1.107125545 | 4.16E-09    |
| AC099489.1 | -1.110053866 | 0.000835765 |
| HLA-DPA1   | -1.114991054 | 4.73E-08    |
| DNAH2      | -1.115345056 | 9.85E-05    |

|           |              |             |
|-----------|--------------|-------------|
| MS4A1     | -1.118757245 | 0.008890521 |
| ZBTB16    | -1.119886467 | 0.00320879  |
| ZIC5      | -1.132245787 | 6.60E-05    |
| FPR2      | -1.133152748 | 4.14E-05    |
| IL1RN     | -1.136516678 | 4.06E-09    |
| LCK       | -1.142086263 | 3.33E-08    |
| TCL1A     | -1.142302657 | 0.001047413 |
| CNIH2     | -1.143281419 | 0.005511461 |
| XKR9      | -1.144393963 | 6.75E-06    |
| CD7       | -1.145819493 | 6.60E-11    |
| HOXC8     | -1.146391573 | 0.000141021 |
| FCRL6     | -1.148008721 | 1.06E-07    |
| MSH4      | -1.149801842 | 0.000565222 |
| RAB39B    | -1.151450233 | 4.62E-05    |
| OR2I1P    | -1.154128862 | 0.003418761 |
| SCG2      | -1.160271075 | 0.000270223 |
| DUSP4     | -1.160412933 | 2.54E-10    |
| SECTM1    | -1.163013991 | 8.67E-12    |
| GNLY      | -1.164517187 | 6.02E-06    |
| OSR1      | -1.16906157  | 5.77E-13    |
| PNMA2     | -1.169148799 | 1.25E-05    |
| ACKR4     | -1.171485513 | 9.75E-07    |
| GZMA      | -1.175039065 | 4.57E-09    |
| VNN3      | -1.176584694 | 2.25E-05    |
| SSTR2     | -1.177132498 | 0.000324942 |
| SRRM3     | -1.177374139 | 0.001487221 |
| CHIT1     | -1.178416257 | 0.000454497 |
| SPATC1    | -1.179363139 | 3.15E-05    |
| PDCD1     | -1.179925758 | 3.84E-09    |
| IFNG      | -1.181762926 | 0.000232418 |
| ZNF831    | -1.183014926 | 7.80E-06    |
| ABCA3     | -1.183650178 | 7.28E-06    |
| GABRB3    | -1.184237995 | 0.002291615 |
| CCL19     | -1.185020222 | 0.006395799 |
| AQP9      | -1.18923642  | 4.04E-05    |
| RARRES3   | -1.191404939 | 6.83E-10    |
| GPR18     | -1.193640805 | 0.002637833 |
| HOXD1     | -1.198625206 | 6.07E-06    |
| GPR174    | -1.204427523 | 5.53E-05    |
| KIAA1549L | -1.204488326 | 1.04E-05    |
| HOXC4     | -1.208433651 | 2.67E-08    |
| GBP4      | -1.209766333 | 7.08E-08    |
| CRTAM     | -1.210737943 | 1.21E-08    |
| FMO2      | -1.212374092 | 0.003371677 |

|            |              |             |
|------------|--------------|-------------|
| GZMK       | -1.21249588  | 1.53E-07    |
| ZNF683     | -1.216695283 | 2.20E-08    |
| HBA2       | -1.218067887 | 5.97E-05    |
| CHI3L2     | -1.224274552 | 2.39E-05    |
| RAB27B     | -1.226616116 | 1.27E-12    |
| FOXD1      | -1.234813444 | 1.75E-06    |
| NXPH4      | -1.2372315   | 0.002871554 |
| VTCN1      | -1.23778041  | 0.000415786 |
| SIX4       | -1.23824194  | 0.001589264 |
| LHB        | -1.243280791 | 6.70E-05    |
| RARRES1    | -1.244027679 | 1.85E-11    |
| B3GALT5    | -1.246453902 | 5.58E-08    |
| SPON1      | -1.251976907 | 9.11E-10    |
| KIR2DL4    | -1.252475644 | 1.88E-09    |
| PTPRU      | -1.256448259 | 5.10E-07    |
| SP140      | -1.259150172 | 7.33E-09    |
| HTR3A      | -1.263384277 | 3.85E-06    |
| PRPH       | -1.264637041 | 0.005763151 |
| HABP2      | -1.265376471 | 0.000342321 |
| AC008687.4 | -1.269432505 | 0.009181016 |
| TFF1       | -1.274271027 | 0.000838827 |
| MUC17      | -1.290661123 | 0.00182548  |
| TRIM7      | -1.293969579 | 8.94E-10    |
| CD109      | -1.29809979  | 8.53E-08    |
| MUCL3      | -1.304493968 | 5.26E-07    |
| EMX1       | -1.304705545 | 2.44E-05    |
| KISS1R     | -1.310525561 | 0.002845466 |
| CIDEC      | -1.315285879 | 7.05E-06    |
| SOX8       | -1.319054827 | 2.44E-06    |
| SNPH       | -1.323432218 | 1.77E-09    |
| ARX        | -1.326527854 | 0.000146254 |
| GRAMD1B    | -1.337286223 | 2.93E-07    |
| UGT1A1     | -1.343234841 | 4.41E-05    |
| CXCL13     | -1.347946818 | 2.35E-08    |
| CHST6      | -1.349994537 | 1.15E-08    |
| HOXC9      | -1.351255132 | 1.24E-06    |
| ABCB11     | -1.353166316 | 1.99E-06    |
| ELOVL3     | -1.355005437 | 9.12E-08    |
| KRT7       | -1.356930492 | 1.46E-08    |
| NXF3       | -1.357182946 | 1.22E-06    |
| ONECUT2    | -1.360045236 | 0.000987885 |
| SYT5       | -1.362478575 | 1.08E-05    |
| FER1L6     | -1.363330921 | 4.75E-06    |
| MYRFL      | -1.375006759 | 0.005975398 |

|           |              |             |
|-----------|--------------|-------------|
| SMTNL1    | -1.37717199  | 6.96E-05    |
| ZBED2     | -1.381196923 | 8.22E-09    |
| FCGR3B    | -1.383845705 | 0.000115466 |
| CIITA     | -1.389340937 | 2.88E-09    |
| PI3       | -1.392135892 | 1.11E-05    |
| FFAR2     | -1.400315069 | 0.000184179 |
| DHRS9     | -1.403036991 | 0.000183436 |
| WNT10B    | -1.408411154 | 0.000291212 |
| NTSR1     | -1.411737062 | 4.25E-05    |
| PRDM8     | -1.433045805 | 9.27E-13    |
| TPO       | -1.437631166 | 1.37E-11    |
| IL17REL   | -1.440994824 | 1.09E-05    |
| PLA2G2D   | -1.444993628 | 1.93E-05    |
| HOMER2    | -1.449415433 | 0.000278882 |
| VNN2      | -1.454213581 | 8.95E-12    |
| SAA2      | -1.490833109 | 5.27E-05    |
| GBP5      | -1.492995841 | 5.71E-08    |
| HLA-DOA   | -1.493319558 | 5.27E-07    |
| SNAP25    | -1.519173296 | 0.006864076 |
| VSIG1     | -1.521921032 | 0.000452766 |
| IGLON5    | -1.522216748 | 0.000226849 |
| EPHB6     | -1.525656854 | 0.002349364 |
| RSP03     | -1.535622896 | 1.11E-05    |
| HOXC6     | -1.539220652 | 2.02E-07    |
| APLP1     | -1.548996434 | 3.65E-06    |
| CTSE      | -1.549851431 | 1.86E-07    |
| RTBDN     | -1.553766703 | 5.43E-05    |
| CLCA4     | -1.556697814 | 0.007249952 |
| COLGALT2  | -1.560549888 | 0.002611456 |
| GABRP     | -1.564248927 | 1.97E-05    |
| IDO1      | -1.565476994 | 5.02E-05    |
| ADRB1     | -1.586929596 | 1.13E-08    |
| WNT7B     | -1.587713279 | 0.000472194 |
| DRGX      | -1.594141689 | 1.20E-05    |
| CCK       | -1.599062644 | 3.94E-06    |
| PSCA      | -1.604043897 | 0.004234871 |
| S100A8    | -1.615885886 | 0.000114037 |
| SAA2-SAA4 | -1.615975766 | 0.001232727 |
| NEUROG3   | -1.619526126 | 0.000156804 |
| TUBB4A    | -1.631540249 | 0.001631051 |
| UNC5A     | -1.671709978 | 3.12E-05    |
| SAA1      | -1.699237463 | 7.21E-05    |
| FAM83A    | -1.704533274 | 0.000353221 |
| NMUR2     | -1.723588025 | 8.01E-05    |

|          |              |             |
|----------|--------------|-------------|
| HMX3     | -1.731055483 | 1.27E-05    |
| HRASLS   | -1.739706065 | 2.75E-05    |
| ADGRF1   | -1.776943114 | 0.001040891 |
| MUC5AC   | -1.803249466 | 0.002581158 |
| SMIM18   | -1.80870464  | 0.007852343 |
| PM20D1   | -1.822045971 | 0.004072436 |
| CAMK2N2  | -1.831581382 | 0.000128003 |
| F5       | -1.927891703 | 6.94E-05    |
| LY6D     | -1.940482746 | 0.000400518 |
| ANXA10   | -1.996687062 | 9.00E-09    |
| LEP      | -2.040366607 | 0.006997419 |
| CRYBA2   | -2.049037554 | 0.001553898 |
| TRPV6    | -2.090106792 | 1.53E-09    |
| CD177    | -2.10116449  | 2.20E-05    |
| PSAPL1   | -2.151134651 | 4.92E-08    |
| UNC13A   | -2.192217879 | 4.25E-06    |
| HOXC12   | -2.204734179 | 0.001609903 |
| INSM1    | -2.214543691 | 0.00917142  |
| VNN1     | -2.217818303 | 9.63E-11    |
| SLC26A9  | -2.220189331 | 0.000254569 |
| PON1     | -2.309857806 | 0.005206827 |
| CYP1A1   | -2.317765021 | 0.008365202 |
| MUC6     | -2.343051911 | 0.00016574  |
| SERPINB7 | -2.348059457 | 0.000192101 |
| SPRR3    | -2.354492111 | 0.000139586 |
| SERPINB2 | -2.382168138 | 0.000138681 |
| TP63     | -2.419108822 | 0.00273933  |
| KRT16    | -2.462021221 | 3.90E-05    |
| TM4SF4   | -2.479026997 | 1.20E-06    |
| SCEL     | -2.524552145 | 1.04E-05    |
| PAX4     | -2.672545064 | 0.00962652  |
| SEMG1    | -2.684363145 | 1.48E-07    |
| AQP5     | -2.809972913 | 8.50E-06    |
| GP2      | -2.93765475  | 0.003522772 |
| MSMB     | -2.968053657 | 0.004525496 |
| HOXC10   | -2.996648615 | 1.81E-05    |
| SPRR1B   | -3.144864532 | 1.69E-06    |
| CLDN18   | -3.349002749 | 1.52E-10    |
| GPR87    | -3.477130334 | 1.26E-05    |
| SEMG2    | -4.282387504 | 8.61E-06    |
