# Supplementary figures and images for: Alteration in the Immune Microenvironment Based on APC Status in MSS/pMMR Colon Cancer
Source: Hindawi journal article supplement (doi:10.1155/2022/3592990), 2022-07-27

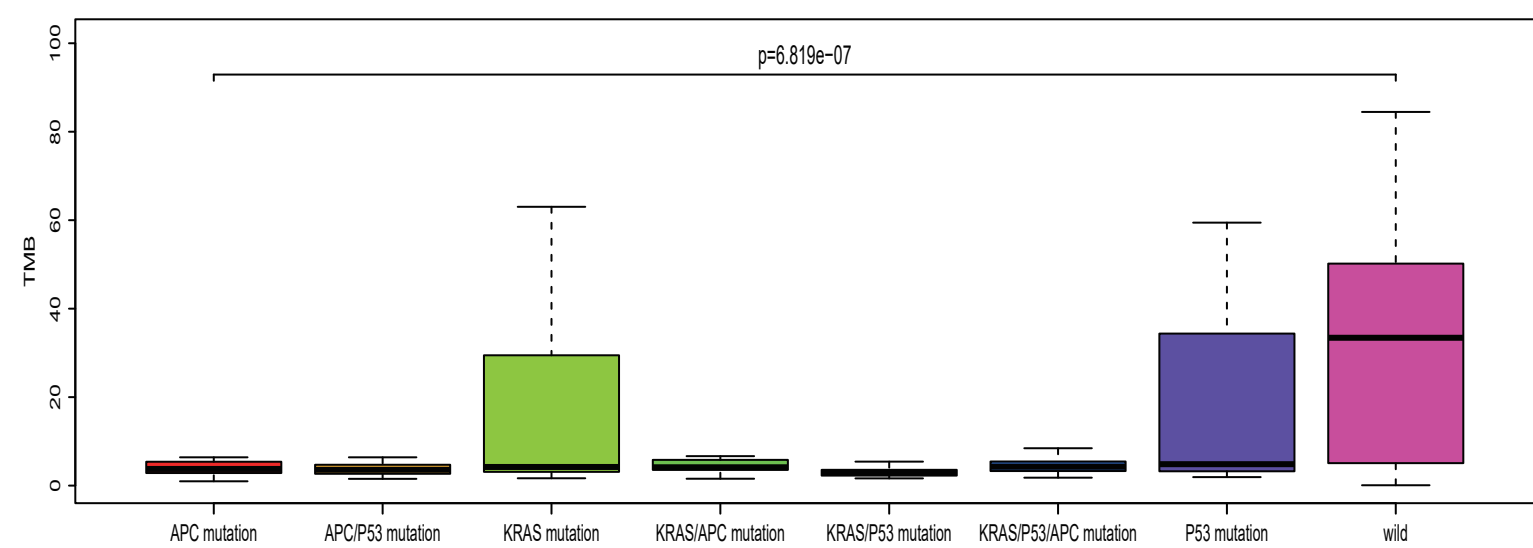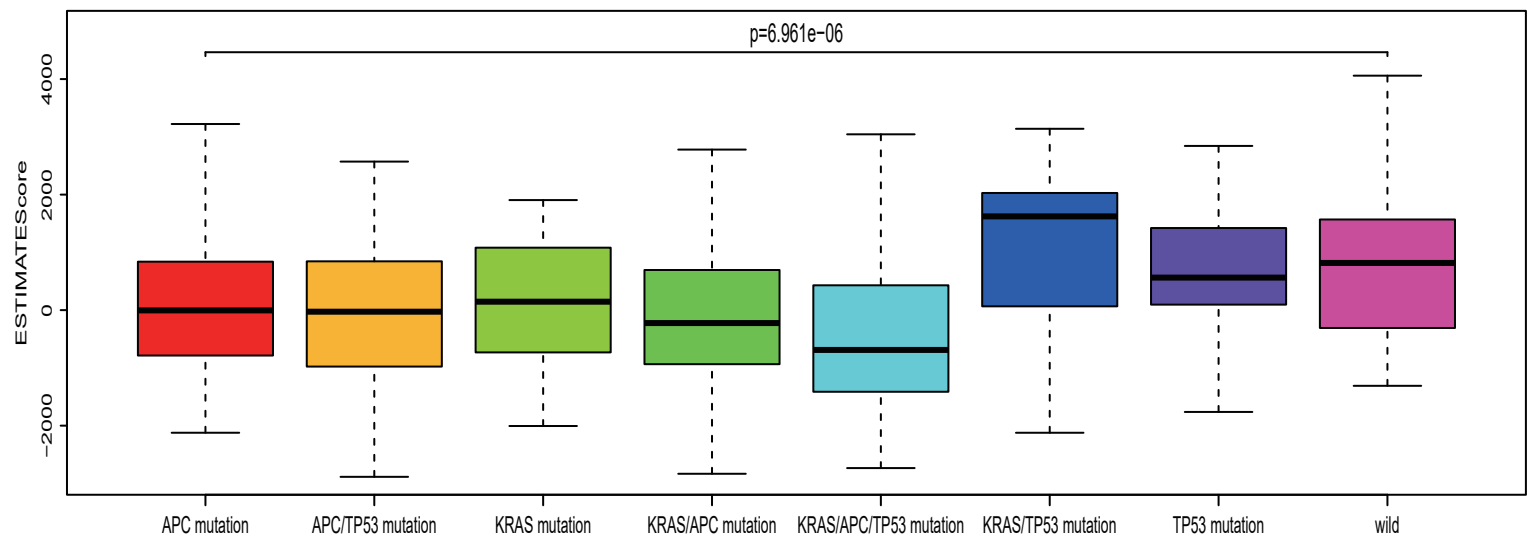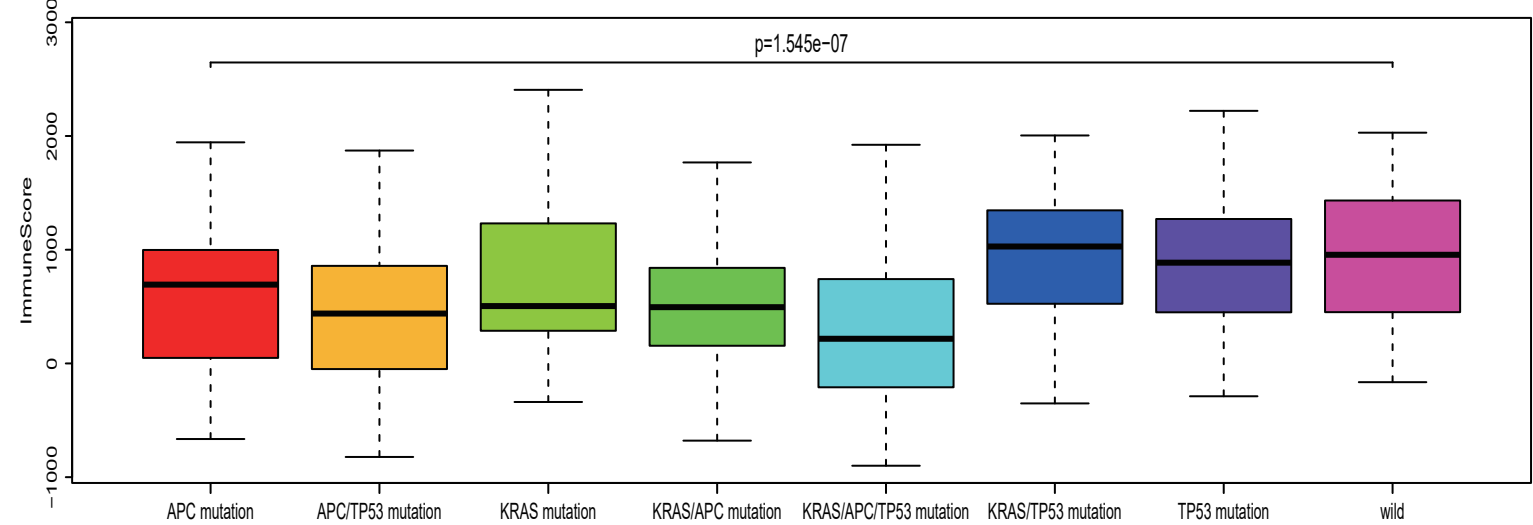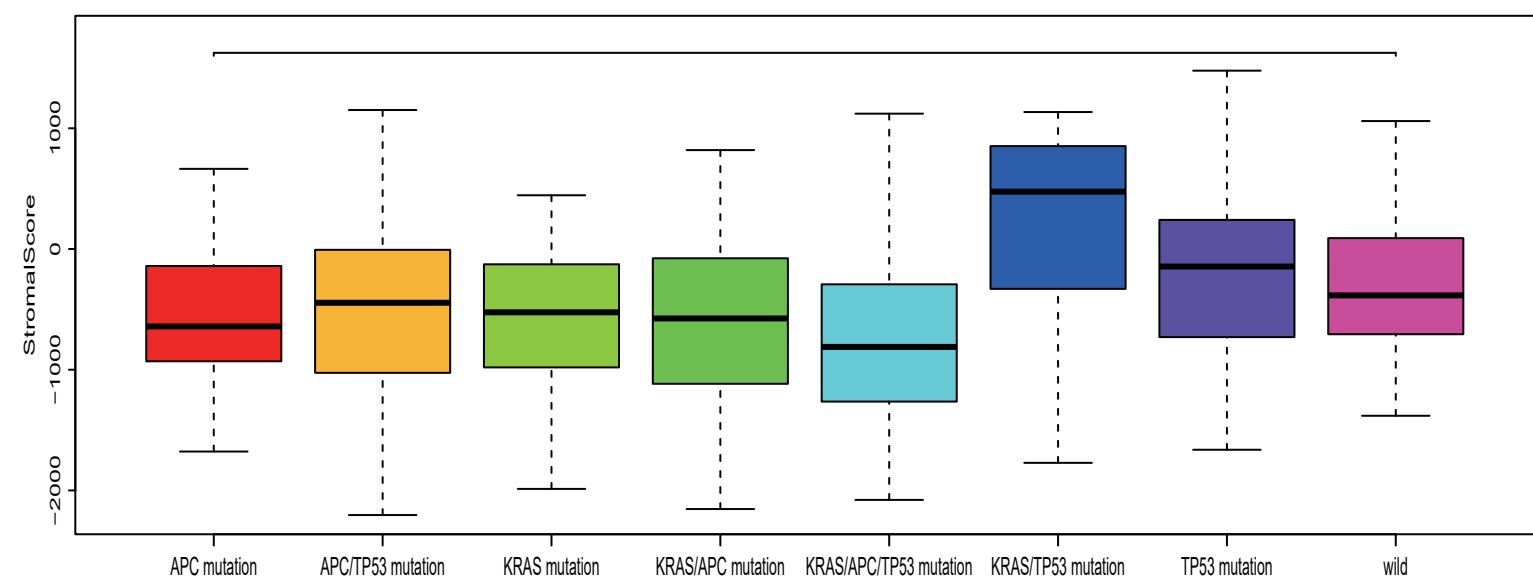

Supplement: f1 [file 3592990.f1.zip]

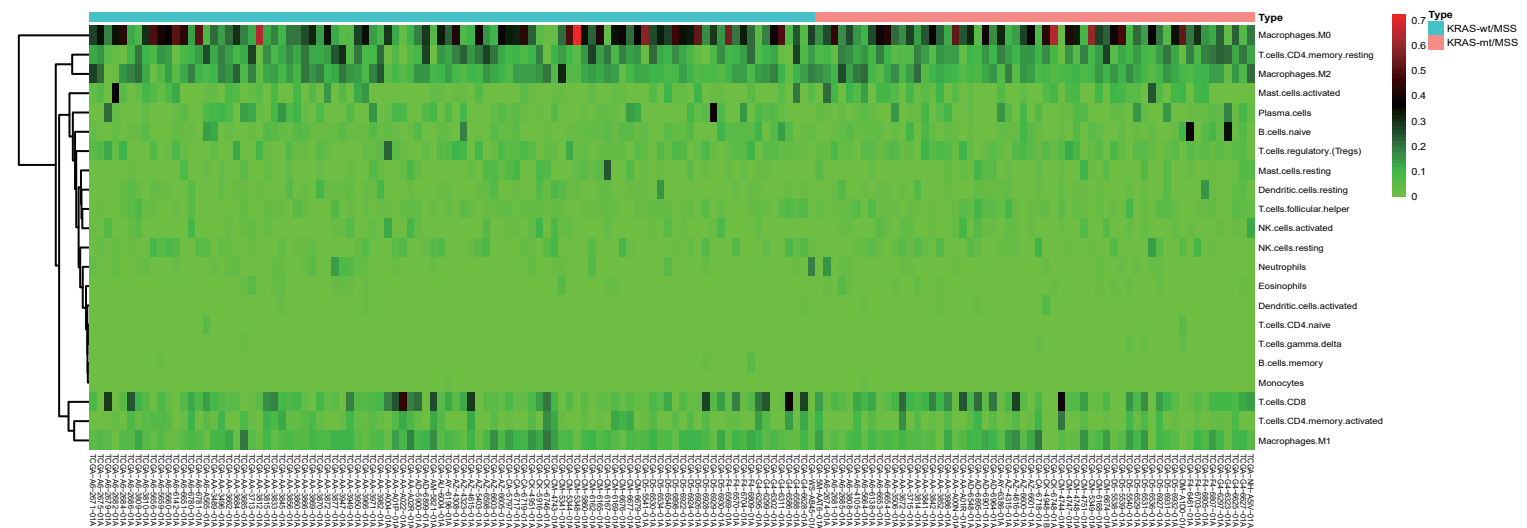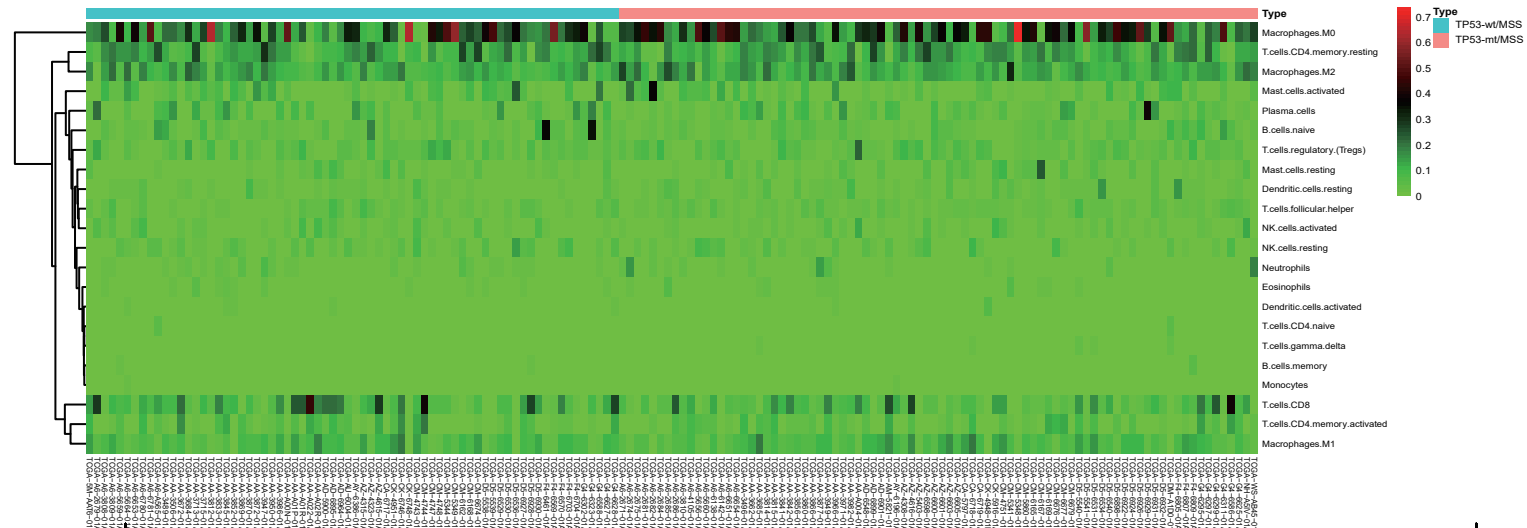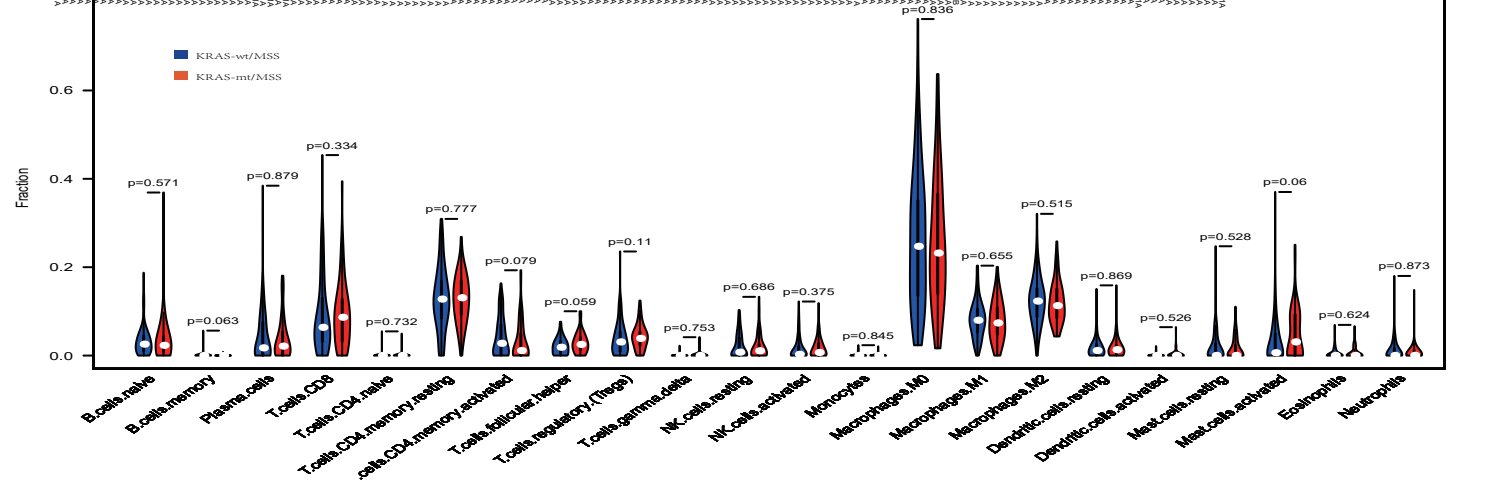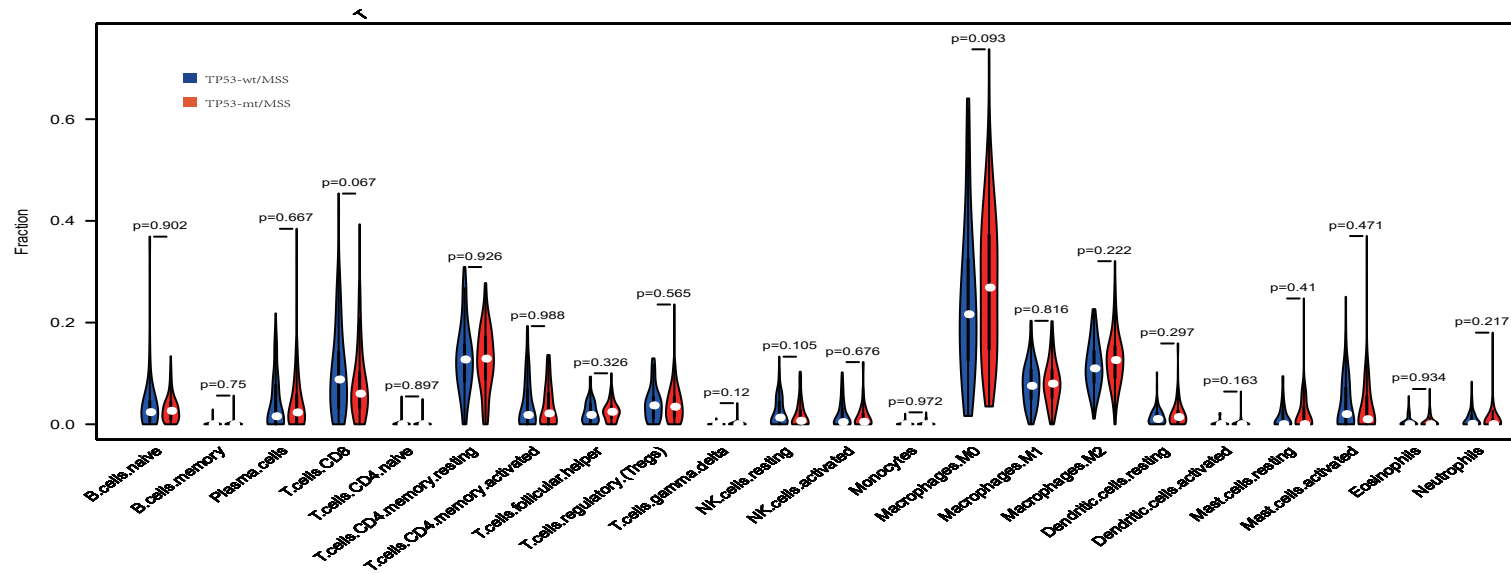

Supplement: f1 [file 3592990.f1.zip]

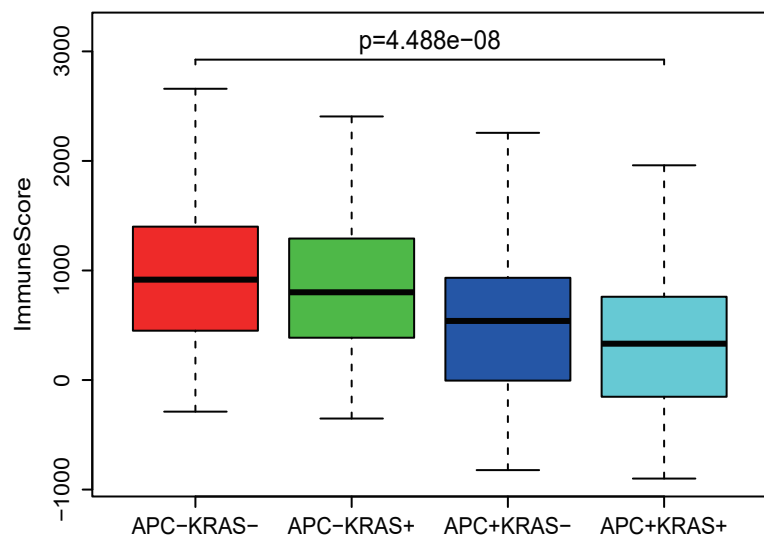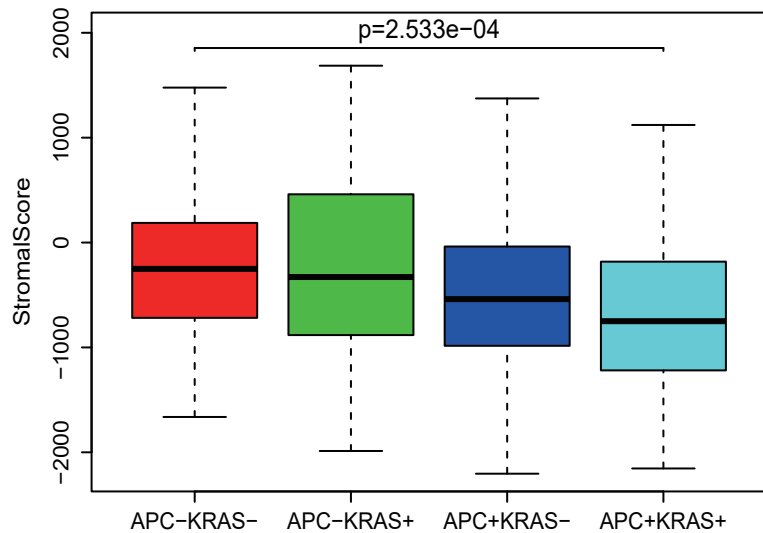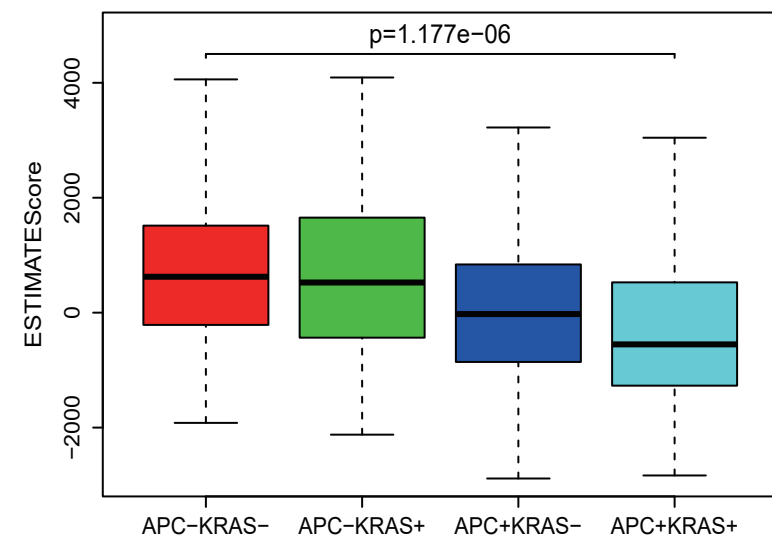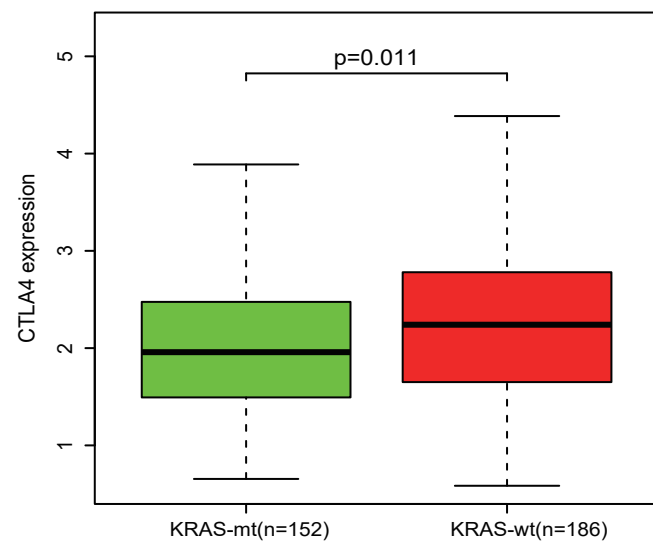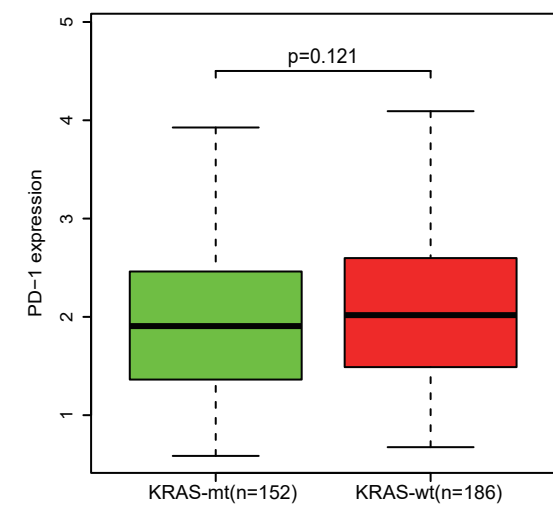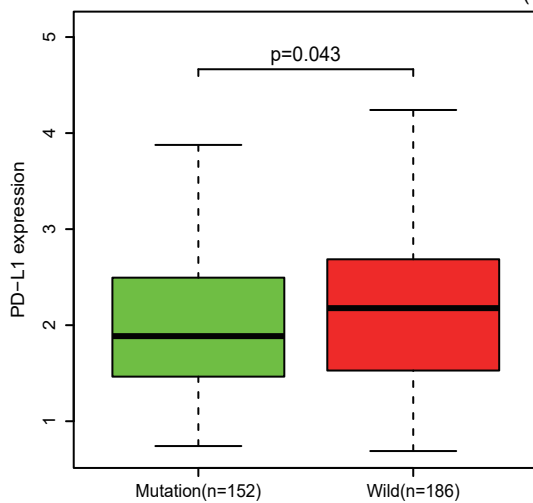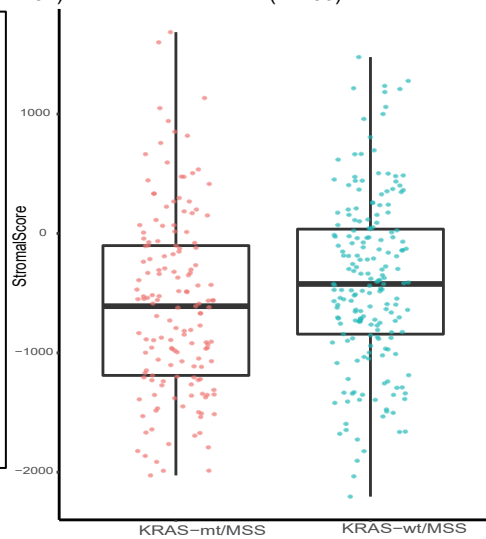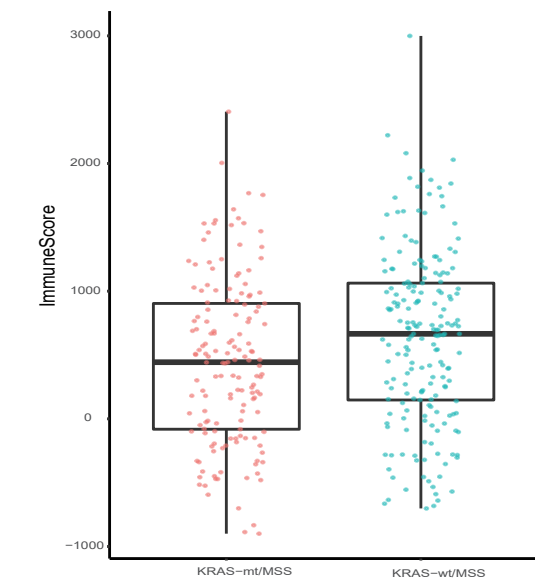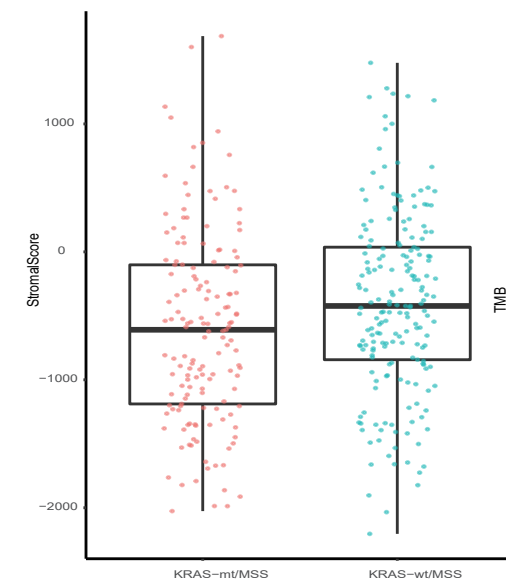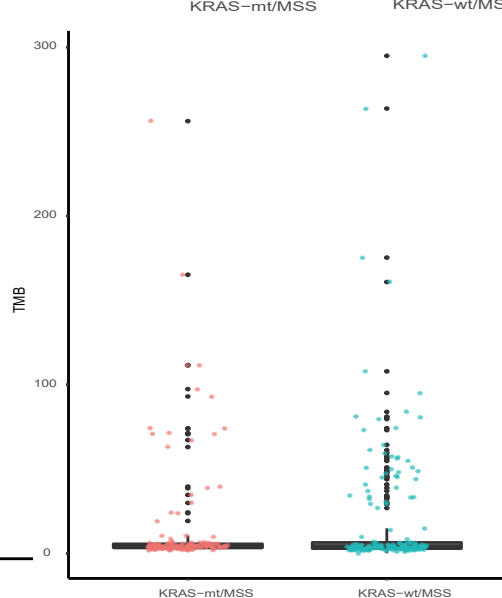

Supplement: f1 [file 3592990.f1.zip]

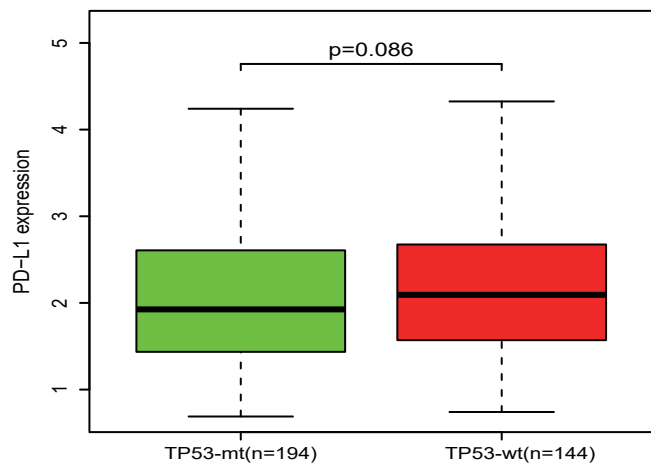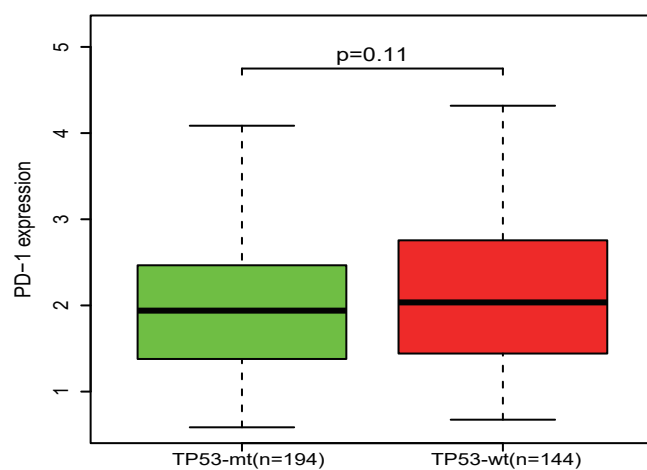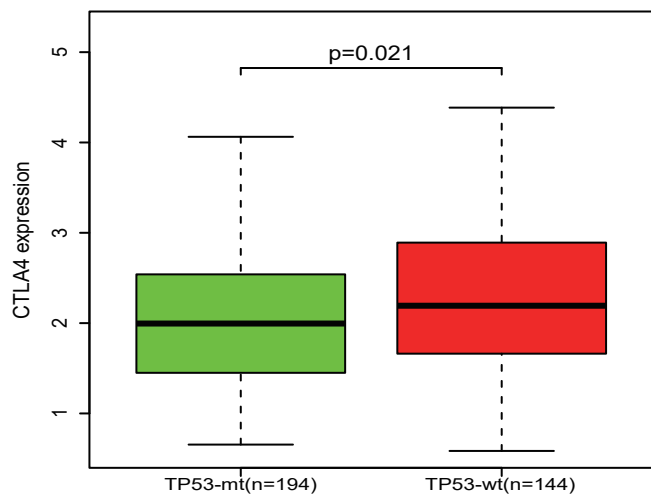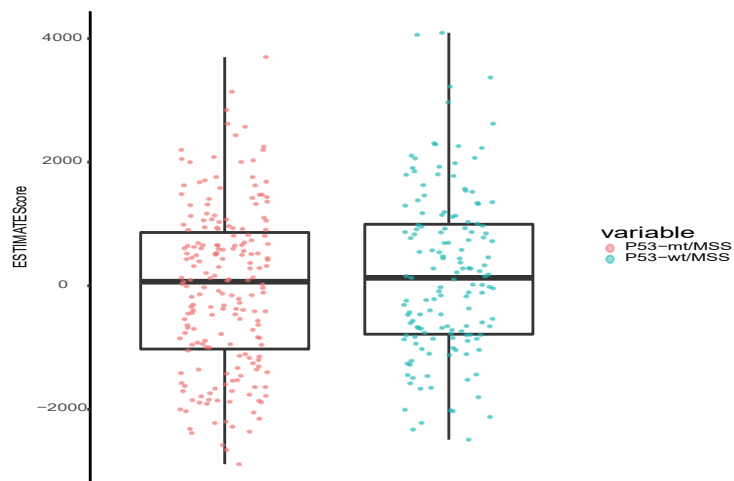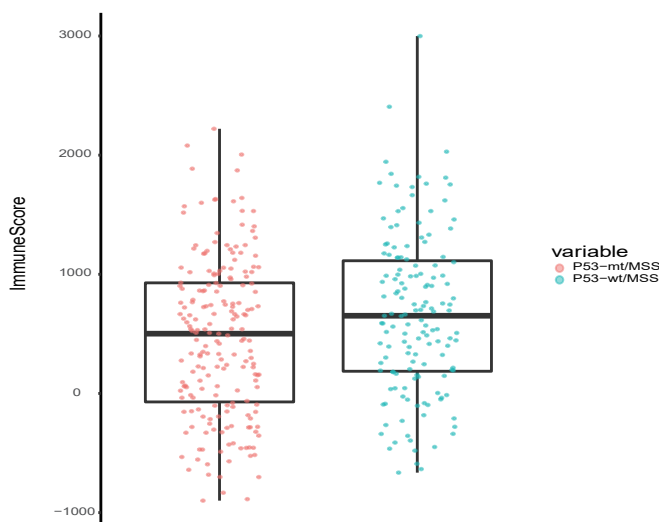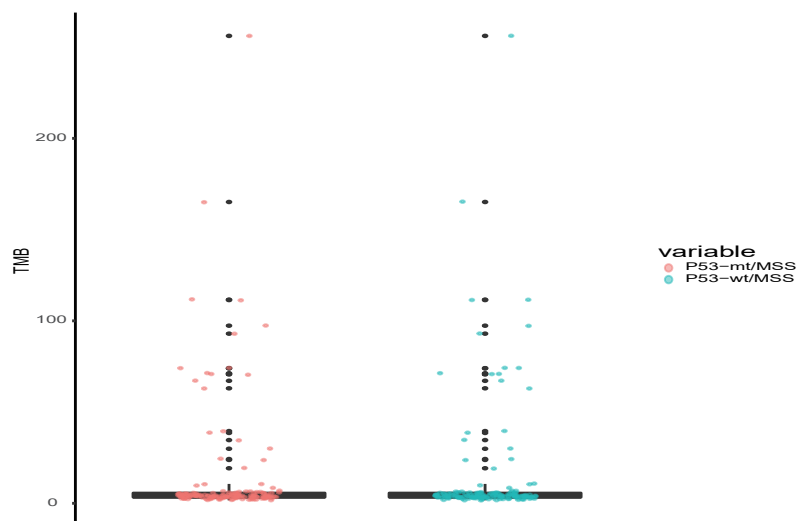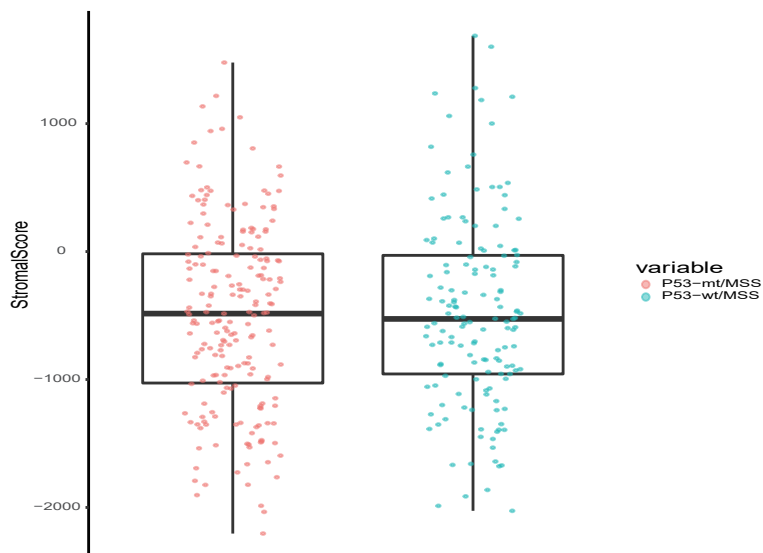

Supplement: f1 [file 3592990.f1.zip]
